# Supplementary material for: Discovery of novel SS-31 (d-Arg-dimethylTyr-Lys-Phe-NH2) derivatives as potent agents to ameliorate inflammation and increase mitochondrial ATP synthesis
Source: Royal Society of Chemistry journal article supplement (doi:10.1039/d4ra05517a), 2024-01-01
Supplement: d4ra05517a1.pdf [file d4ra05517a1.pdf]

## Discovery of novel SS-31 (D-Arg-dimethylTyr-Lys-Phe-NH<sub>2</sub>) derivatives as potent agents to ameliorate inflammation and increase mitochondrial ATP synthesis

Mei Li,<sup>1,2</sup> Deyuan Kong,<sup>2</sup> Liying Meng,<sup>2,3</sup> Zheyi Wang,<sup>1,2</sup> Zetai Bai,<sup>1,2</sup> Guanzhao Wu<sup>1,2,3,\*</sup>

<sup>1</sup> Qilu Hospital, Cheeloo College of Medicine, Shandong University, Jinan 250012, Shandong, China

<sup>2</sup> Qingdao Key Lab of Mitochondrial Medicine, Qilu Hospital, Cheeloo College of Medicine, Shandong University, Qingdao, 266103, China

<sup>3</sup> Department of Medical Experimental Center, Qilu Hospital (Qingdao), Shandong University, Qingdao 266035, Shandong, China

### Biological Assay

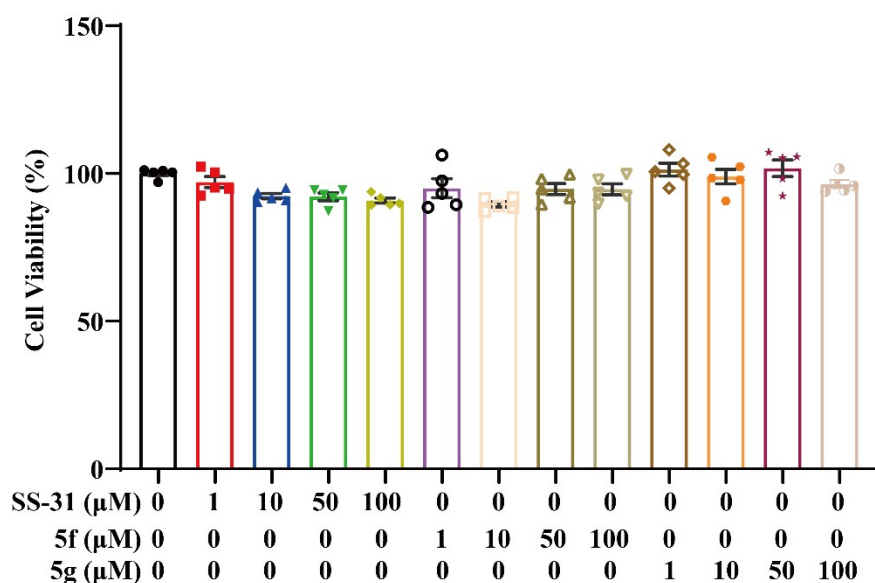

Figure S1. Cytotoxicity of SS-31, **5f**, and **5g** on HT22 cell at 1, 10, 50, and 100 μM. Cell viability was determined as the percentage of untreated cells. Bars represent mean ± SEM of at least three independent measurements.

### Synthesis of SS-31 and Analogs

All peptides were purchased from GL Biochem and prepared using manual solid-phase peptide synthesis with the 9-fluorenylmethyloxycarbonyl (Fmoc) strategy. The C-terminal phenylalanyl residue was coupled to the resin (p-methylbenzhydrylamine polystyrene–1% divinylbenzene) via a

Rink amide linker [p-(Fmoc-2,4-dimethoxybenzyl)-phenoxyacetic acid]. The other amino acid residues were incorporated through successive cycles of Fmoc deprotection and amino acid coupling. After the solid-phase assembly of the peptide, the cleavage reaction from the resin and concomitant side-chain deprotection in one step with TFA yielded the crude peptide with C-terminal amides. The crude preparation was then precipitated and dried. Purification was performed by preparative reverse-phase HPLC in the TFA buffer. The selected pools were mixed to form a homogeneous solution in water before freeze-drying and packaging.

Briefly, 0.2 mmol of Rink Amide AM resin (1 equiv) was added to the peptide synthesis vessel. After a standard washing procedure (DMF twice, DCM twice, DMF once, DCM once, DMF twice), the resin was swollen in a DMF/DCM = 3:1 (v/v) solution for 0.5 hours at 28°C. The Fmoc protecting groups were removed using 20% piperidine in DMF at 28°C for 15 minutes. To accelerate reaction efficiency, the HCTU/DIEA-based condensation system (Fmoc-amino acids:HBTU = 3 equiv:3 equiv:9 equiv) was utilized for the rapid manual coupling of amino acid residues. Fmoc-amino acids, HCTU, and DIEA were mixed in DMF, preactivated for 5-6 minutes at room temperature, and then added to the peptide synthesis vessel for coupling. The Fmoc protection of the current amino acid was subsequently removed, and the process was repeated.

After all coupling reactions were completed, the peptide resin was washed with DMF, DCM, and CH<sub>3</sub>OH, and then dried in a vacuum. The peptide resin cleavage and deprotection were carried out using TFA cleavage cocktails (TFA/phenol/H<sub>2</sub>O/TIPS, 88:5:5:2, v/v/v/v) for 2 hours at 5°C. The obtained crude products were concentrated with pure nitrogen and subsequently precipitated with precooled anhydrous ethyl ether. The mixtures were centrifuged to precipitate the crude peptide, which was then dissolved in a specific ratio of CH<sub>3</sub>CN/H<sub>2</sub>O solvents (containing 0.1% TFA, v/v). Finally, through semipreparative RP-HPLC (Shimadzu Prominence, LC-20A) purification and 24-48 hours of lyophilization, the target solid peptide was obtained. The purity of the obtained peptides was analyzed by analytical RP-HPLC and ESI-MS.

Product Name :SS-31-Y r-Y-K-F-NH2  
 Lot No :P230421-JH60064  
 Column :Gemini-NX 5 $\mu$  C18 110A, 4.6\*250mm  
 Solvent A :0.1%Trifluoroacetic in 100% Acetonitrile  
 Solvent B :0.1%Trifluoroacetic in 100% Water  
 Gradient :
 

|          |      |     |
|----------|------|-----|
|          | A    | B   |
| 0.01min  | 20%  | 80% |
| 25min    | 40%  | 60% |
| 25.01min | 100% | 0%  |
| 30min    | Stop |     |

Flow rate :1.0ml/min  
 Wavelength :220nm  
 Volume :20ul

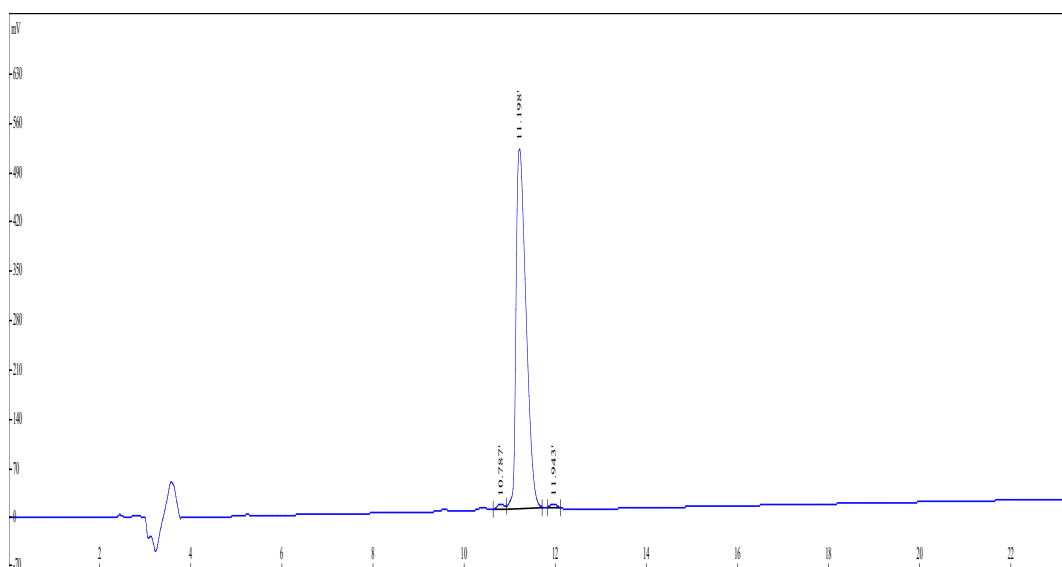

| Rank  | Time   | Conc.   | Area    | Height |
|-------|--------|---------|---------|--------|
| 1     | 10.787 | 0.9063  | 68207   | 6974   |
| 2     | 11.198 | 98.4747 | 7411316 | 509941 |
| 3     | 11.943 | 0.6190  | 46584   | 5297   |
| Total |        | 100     | 7526107 | 522212 |

Figure S2. The HPLC report of **5a**.

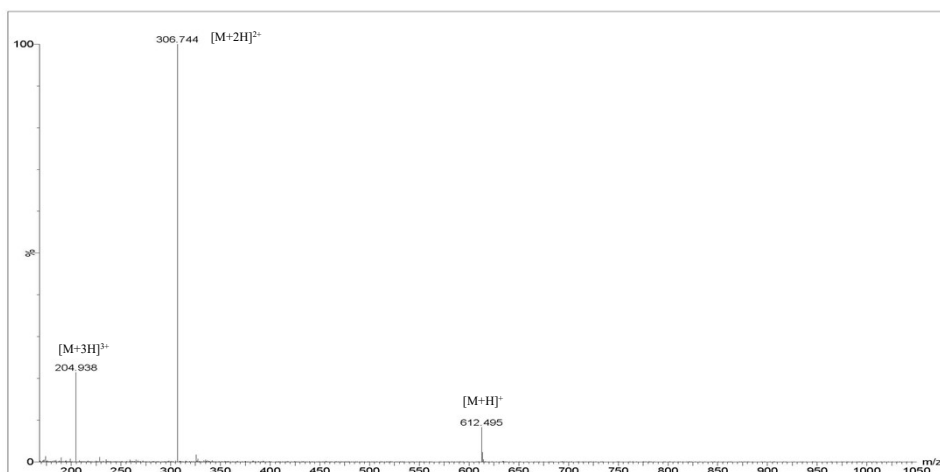

|                                         |                     |                         |                                      |
|-----------------------------------------|---------------------|-------------------------|--------------------------------------|
| Sample Description                      | Instrument          | Waters UPLC H-CLASS_QDA |                                      |
| Analyzed date: 2023-04-21               | Probe:              | ESI                     | Probe Bias: +4.5kv                   |
| Analyst: JH                             | Nebulizer Gas Flow: | 1.5 L/min               | Detector: 1.5kv                      |
| Sample: SS-31-Y r-Y-K-F-NH <sub>2</sub> | CDL:                | -20.0v                  | T. Flow: 0.2mL/min                   |
| M.W.: 611.75                            | CDL Temp.:          | 250 °C                  | B. Conc.: 50%H <sub>2</sub> O/50%ACN |
| Lot. No.: P230421-JH60064               | Block Temp.:        | 200 °C                  |                                      |

Figure S3. The ESI-MS spectrum of **5a**.

Product Name :SS-31-Py r-Py-K-F-NH<sub>2</sub>  
 Lot No :P230524-JH60065  
 Column :Gemini-NX 5μ C18 110A, 4.6\*250mm  
 Solvent A :0.1%Trifluoroacetic in 100% Acetonitrile  
 Solvent B :0.1%Trifluoroacetic in 100% Water  
 Gradient :
 

|           |      |     |
|-----------|------|-----|
|           | A    | B   |
| 0.01min   | 10%  | 90% |
| 25min     | 70%  | 30% |
| 25.01min3 | 100% | 0%  |
| 30min     | Stop |     |

  
 Flow rate :1.0ml/min  
 Wavelength :220nm  
 Volume :20ul

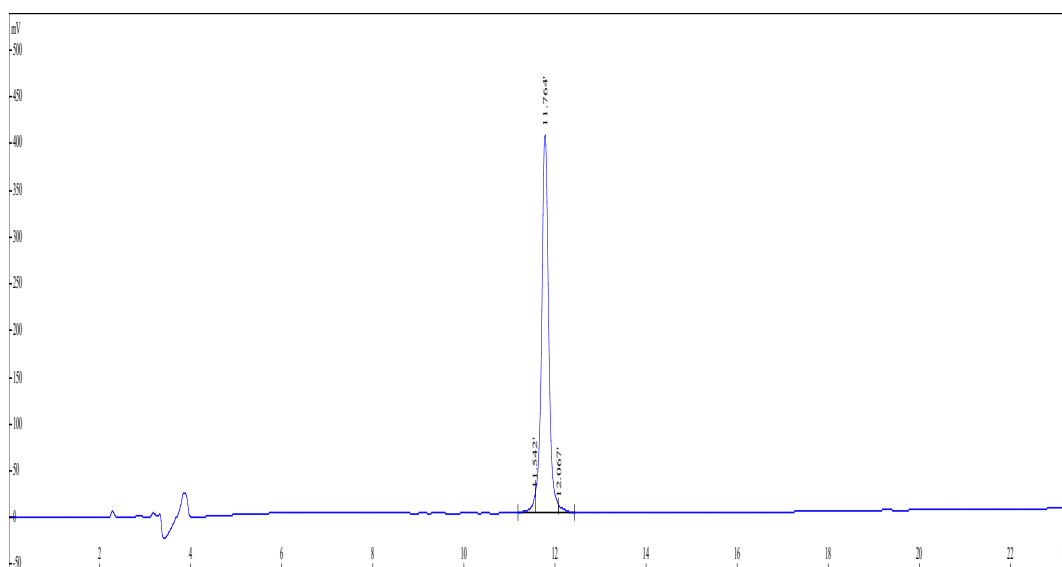

| Rank  | Time   | Conc.   | Area    | Height |
|-------|--------|---------|---------|--------|
| 1     | 11.542 | 2.7260  | 113343  | 16924  |
| 2     | 11.764 | 96.2600 | 4001907 | 402231 |
| 3     | 12.067 | 1.0140  | 42170   | 6617   |
| Total |        | 100     | 4157420 | 425772 |

Figure S4. The HPLC report of **5b**.

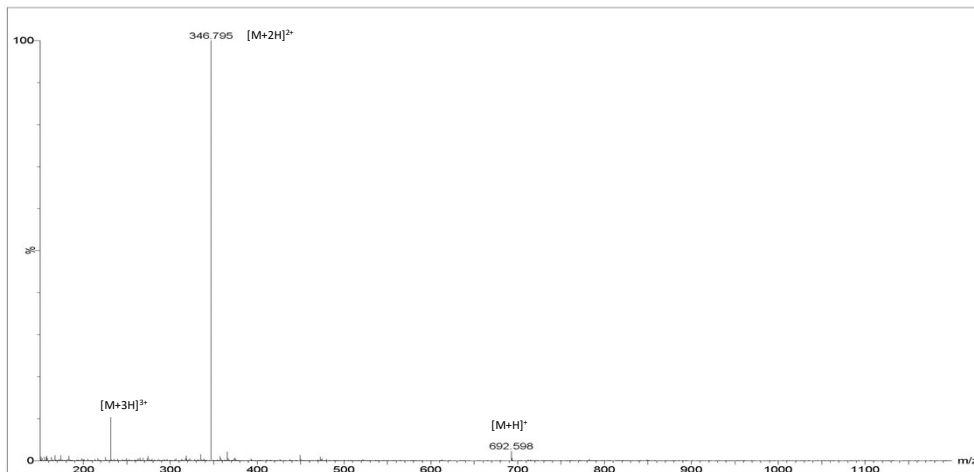

Sample Description

Analyzed date: 2023-05-24  
Analyst: JH  
Sample: SS-31-Py r-Py-K-F-NH<sub>2</sub>  
M.W.: 691.73  
Lot. No.: P230524-JH60065

Instrument

Probe: ESI  
Nebulizer Gas Flow: 1.5 L/min  
CDL: -20.0v  
CDL Temp.: 250 °C  
Block Temp.: 200 °C

Waters UPLC H-CLASS\_QDA

Probe Bias: +4.5kv  
Detector: 1.5kv  
T. Flow: 0.2mL/min  
B. Conc.: 50%H<sub>2</sub>O/50%ACN

Figure S5. The ESI-MS spectrum of **5b**.

Product Name :SS-31-Y r-DOPA-K-F-NH2  
 Lot No :P230421-JH60066  
 Column :Gemini-NX 5 $\mu$  C18 110A, 4.6\*250mm  
 Solvent A :0.1%Trifluoroacetic in 100% Acetonitrile  
 Solvent B :0.1%Trifluoroacetic in 100% Water  
 Gradient :
 

|          |      |     |
|----------|------|-----|
|          | A    | B   |
| 0.01min  | 20%  | 80% |
| 25min    | 45%  | 55% |
| 25.01min | 100% | 0%  |
| 30min    | Stop |     |

  
 Flow rate :1.0ml/min  
 Wavelength :220nm  
 Volume :20ul

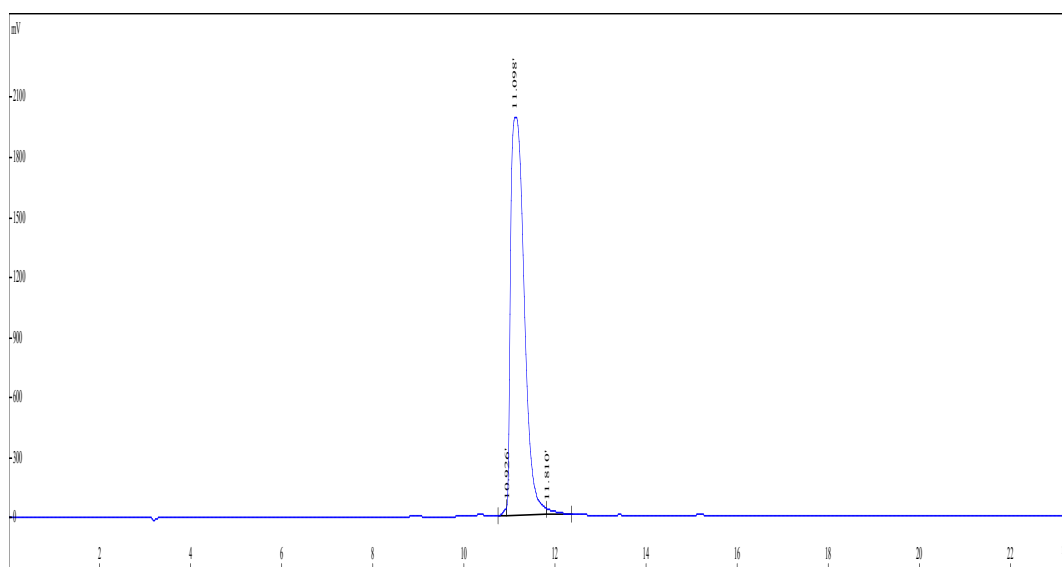

| Rank  | Time   | Conc.   | Area     | Height  |
|-------|--------|---------|----------|---------|
| 1     | 10.926 | 0.3821  | 155132   | 36578   |
| 2     | 11.098 | 98.6850 | 40061738 | 1987144 |
| 3     | 11.810 | 0.9329  | 378698   | 29784   |
| Total |        | 100     | 40595568 | 2053506 |

Figure S6. The HPLC report of **5c**.

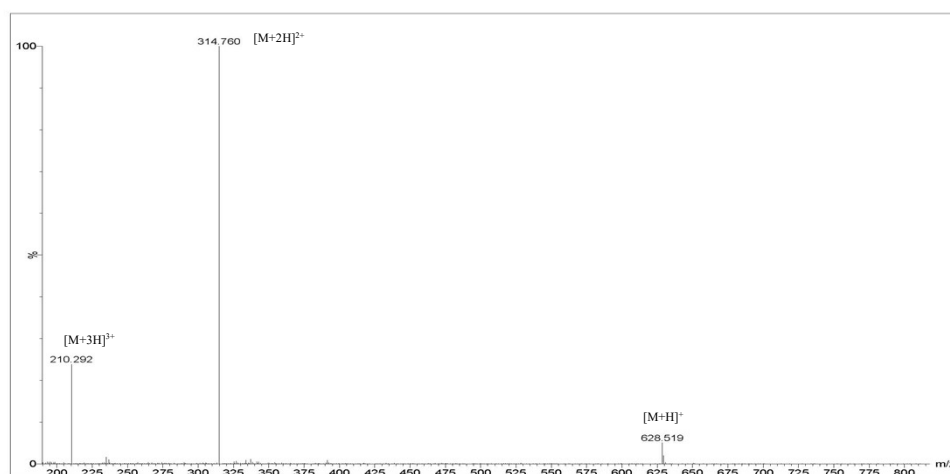

|                                            |                     |                         |                                      |
|--------------------------------------------|---------------------|-------------------------|--------------------------------------|
| Sample Description                         | Instrument          | Waters UPLC H-CLASS_QDA |                                      |
| Analyzed date: 2023-04-21                  | Probe:              | ESI                     | Probe Bias: +4.5kv                   |
| Analyst: JH                                | Nebulizer Gas Flow: | 1.5 L/min               | Detector: 1.5kv                      |
| Sample: SS-31-Y r-DOPA-K-F-NH <sub>2</sub> | CDL:                | -20.0v                  | T. Flow: 0.2mL/min                   |
| M.W.: 627.75                               | CDL Temp.:          | 250 °C                  | B. Conc.: 50%H <sub>2</sub> O/50%ACN |
| Lot. No.: P230421-JH60066                  | Block Temp.:        | 200 °C                  |                                      |

Figure S7. The ESI-MS spectrum of **5c**.



Product Name :SS-31-Y(Cl) r-Y(Cl)-K-F-NH2  
 Lot No :P230423-JH60067  
 Column :Gemini-NX 5 $\mu$  C18 110A, 4.6\*250mm  
 Solvent A :0.1%Trifluoroacetic in 100% Acetonitrile  
 Solvent B :0.1%Trifluoroacetic in 100% Water  
 Gradient :
 

|          |      |      |
|----------|------|------|
|          | A    | B    |
| 0.01min  | 15%  | 85%  |
| 25min    | 40%  | 60%  |
| 25.01min | 100% | 0%   |
| 30min    |      | Stop |

  
 Flow rate :1.0ml/min  
 Wavelength :220nm  
 Volume :20ul

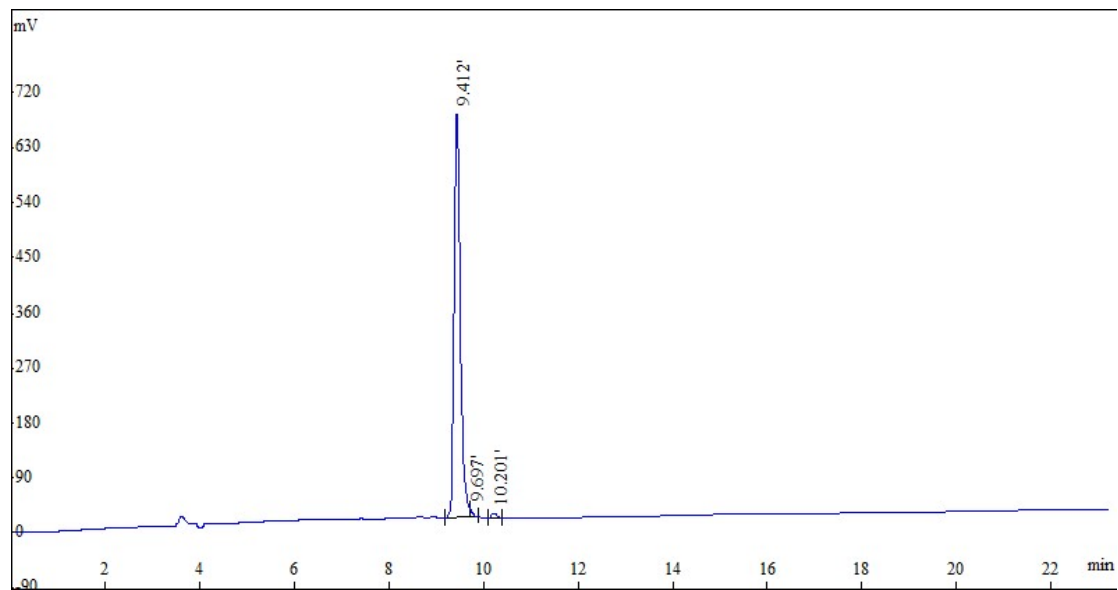

| Rank  | Time   | Conc.   | Area    | Height |
|-------|--------|---------|---------|--------|
| 1     | 9.412  | 98.4791 | 5533672 | 658357 |
| 2     | 9.697  | 0.7298  | 41006   | 11460  |
| 3     | 10.201 | 0.7911  | 44454   | 6061   |
| Total |        | 100     | 5619132 | 675878 |

Figure S8. The HPLC report of **5d**.

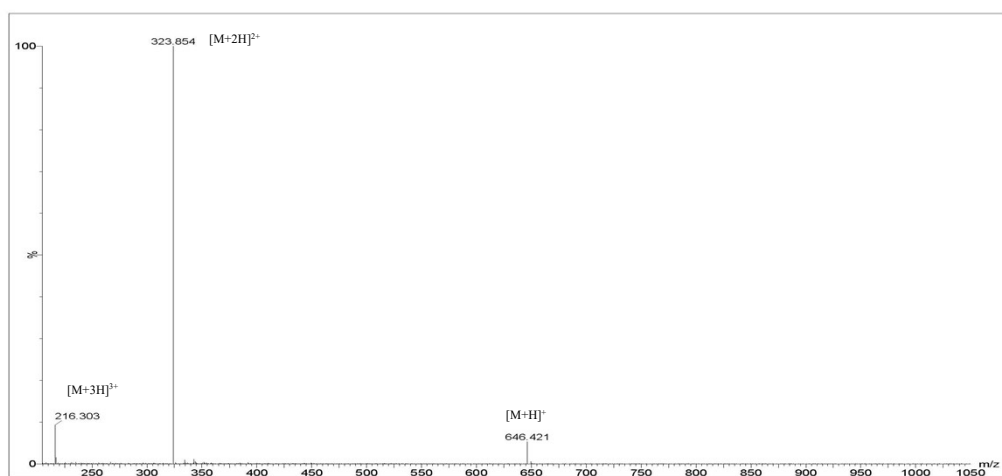

|                                     |                     |                         |                                      |
|-------------------------------------|---------------------|-------------------------|--------------------------------------|
| Sample Description                  | Instrument          | Waters UPLC H-CLASS_QDA |                                      |
| Analyzed date: 2023-04-23           | Probe:              | ESI                     | Probe Bias: +4.5kv                   |
| Analyst: JH                         | Nebulizer Gas Flow: | 1.5 L/min               | Detector: 1.5kv                      |
| Sample: SS-31-Y(Cl) r-Y(Cl)-K-F-NH2 | CDL:                | -20.0v                  | T. Flow: 0.2mL/min                   |
| M.W.: 646.19                        | CDL Temp.:          | 250 °C                  | B. Conc.: 50%H <sub>2</sub> O/50%ACN |
| Lot. No.: P230423-JH60067           | Block Temp.:        | 200 °C                  |                                      |

Figure S9. The ESI-MS spectrum of **5d**.

Product Name :SS-31-Y(NO2) r-Y(NO2)-K-F-NH2  
 Lot No :P230423-JH60068  
 Column :Gemini-NX 5µ C18 110A, 4.6\*250mm  
 Solvent A :0.1%Trifluoroacetic in 100% Acetonitrile  
 Solvent B :0.1%Trifluoroacetic in 100% Water  
 Gradient :
 

|          |      |     |
|----------|------|-----|
|          | A    | B   |
| 0.01min  | 20%  | 80% |
| 25min    | 45%  | 55% |
| 25.01min | 100% | 0%  |
| 30min    | Stop |     |

  
 Flow rate :1.0ml/min  
 Wavelength :220nm  
 Volume :20ul

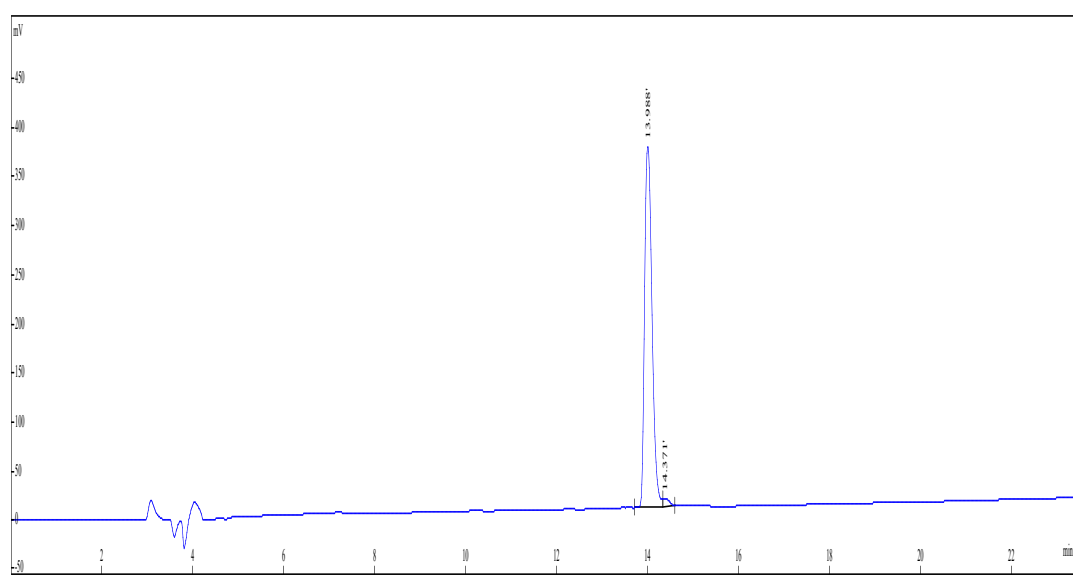

| Rank  | Time   | Conc.   | Area    | Height |
|-------|--------|---------|---------|--------|
| 1     | 13.988 | 98.4067 | 3913239 | 366271 |
| 2     | 14.371 | 1.5933  | 63358   | 7511   |
| Total |        | 100     | 3976597 | 373782 |

Figure S10. The HPLC report of **5e**.

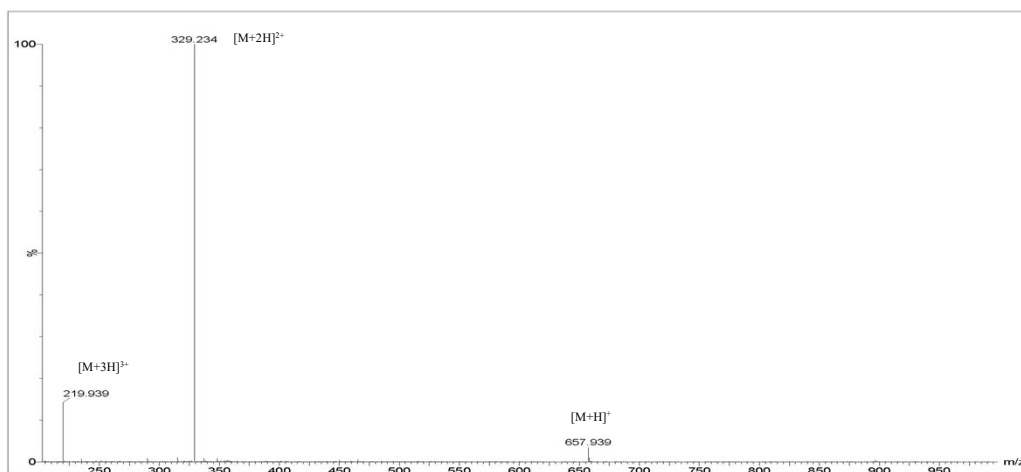

|                                       |                     |                         |                                      |
|---------------------------------------|---------------------|-------------------------|--------------------------------------|
| Sample Description                    | Instrument          | Waters UPLC H-CLASS_QDA |                                      |
| Analyzed date: 2023-04-23             | Probe:              | ESI                     | Probe Bias: +4.5kv                   |
| Analyst: JH                           | Nebulizer Gas Flow: | 1.5 L/min               | Detector: 1.5kv                      |
| Sample: SS-31-Y(NO2) r-Y(NO2)-K-F-NH2 | CDL:                | -20.0v                  | T. Flow: 0.2mL/min                   |
| M.W.: 656.75                          | CDL Temp.:          | 250 °C                  | B. Conc.: 50%H <sub>2</sub> O/50%ACN |
| Lot. No.: P230423-JH60068             | Block Temp.:        | 200 °C                  |                                      |

Figure S11. The ESI-MS spectrum of **5e**.

Structure : Taurine-Suc-SS-31  
 Lot No : P230809-JH71805  
 Column : 4.6×250mm,Boston Green C4 300A  
 Solvent A : 0.1% trifluoroacetic in 100% acetonitrile  
 Solvent B : 0.1% trifluoroacetic in 100% water  
 Gradient :
 

|         |      |     |
|---------|------|-----|
|         | A    | B   |
| 0.01min | 10%  | 90% |
| 25min   | 40%  | 60% |
| 25.1min | 100% | 0%  |
| 30min   | STOP |     |

Flow rate : 1.0 mL/min  
 Wavelength : 220nm  
 Volume : 5ul

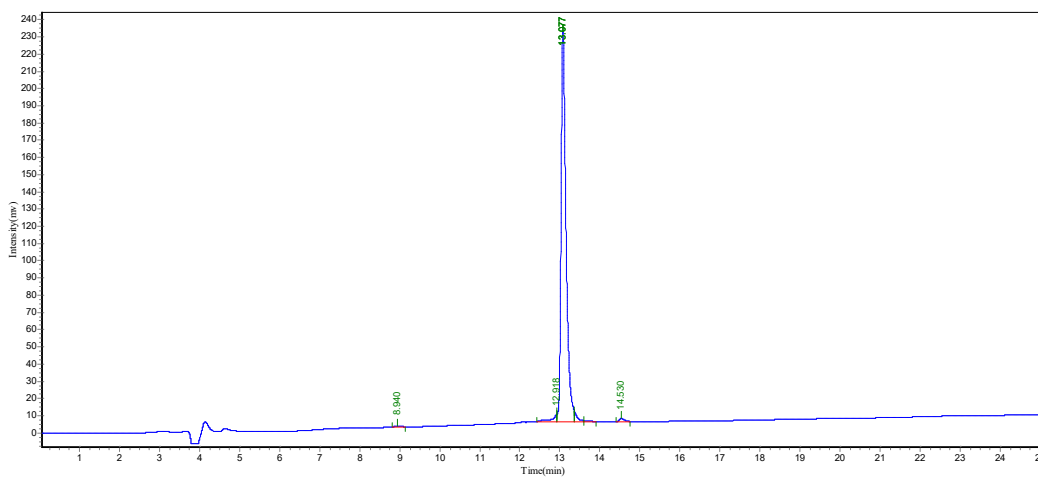

| Peak No. | Ret Time | Height     | Area        | Conc..   |
|----------|----------|------------|-------------|----------|
| 1        | 8.940    | 719.368    | 7594.694    | 0.3740   |
| 2        | 12.918   | 3995.929   | 31708.043   | 1.5615   |
| 3        | 13.077   | 226736.203 | 1938132.500 | 95.4436  |
| 4        | 13.077   | 6108.474   | 29593.805   | 1.4574   |
| 5        | 13.077   | 553.822    | 7076.876    | 0.3485   |
| 6        | 14.530   | 1982.913   | 16551.395   | 0.8151   |
| Total    |          |            |             | 100.0000 |

Figure S12. The HPLC report of **5f**.

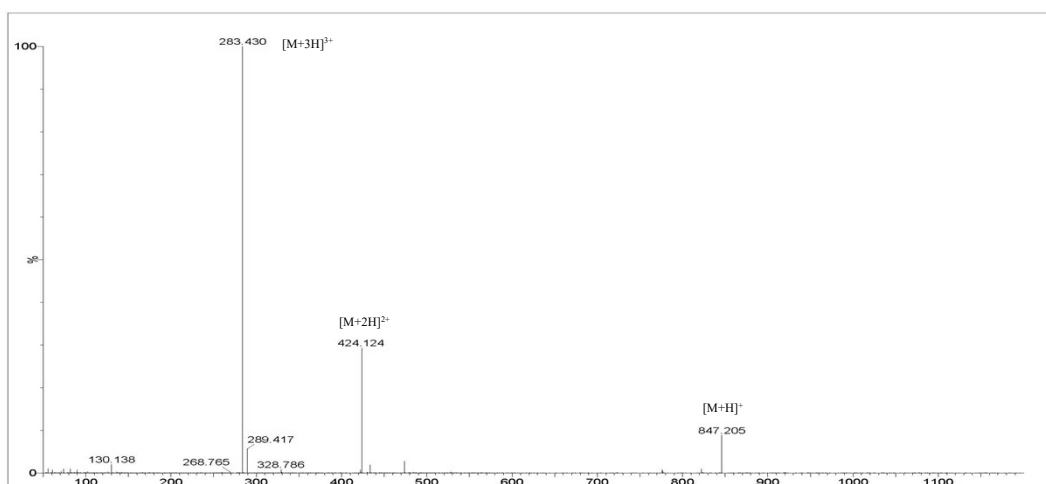

Sample Description

Analyzed date: 2023-08-09  
 Analyst: JH  
 Sample: Taurine-Suc-SS-31  
 M.W.: 847.01  
 Lot. No.: P230809-JH71805

Instrument

Probe: ESI  
 Nebulizer Gas Flow: 1.5 L/min  
 CDL: -20.0v  
 CDL Temp.: 250 °C  
 Block Temp.: 200 °C

Waters UPLC H-CLASS\_QDA

Probe Bias: +4.5kv  
 Detector: 1.5kv  
 T. Flow: 0.2mL/min  
 B. Conc.: 50%H<sub>2</sub>O/50%ACN

Figure S13. The ESI-MS spectrum of **5f**.

Product Name :SS-31-F r-DMT-K-(2-Nal)-NH2  
 Lot No :P230505-JH60070  
 Column :Gemini-NX 5 $\mu$  C18 110A, 4.6\*250mm  
 Solvent A :0.1%Trifluoroacetic in 100% Acetonitrile  
 Solvent B :0.1%Trifluoroacetic in 100% Water  
 Gradient :
 

|          |      |     |
|----------|------|-----|
|          | A    | B   |
| 0.01min  | 10%  | 90% |
| 25min    | 70%  | 30% |
| 25.01min | 100% | 0%  |
| 30min    | Stop |     |

  
 Flow rate :1.0ml/min  
 Wavelength :220nm  
 Volume :20ul

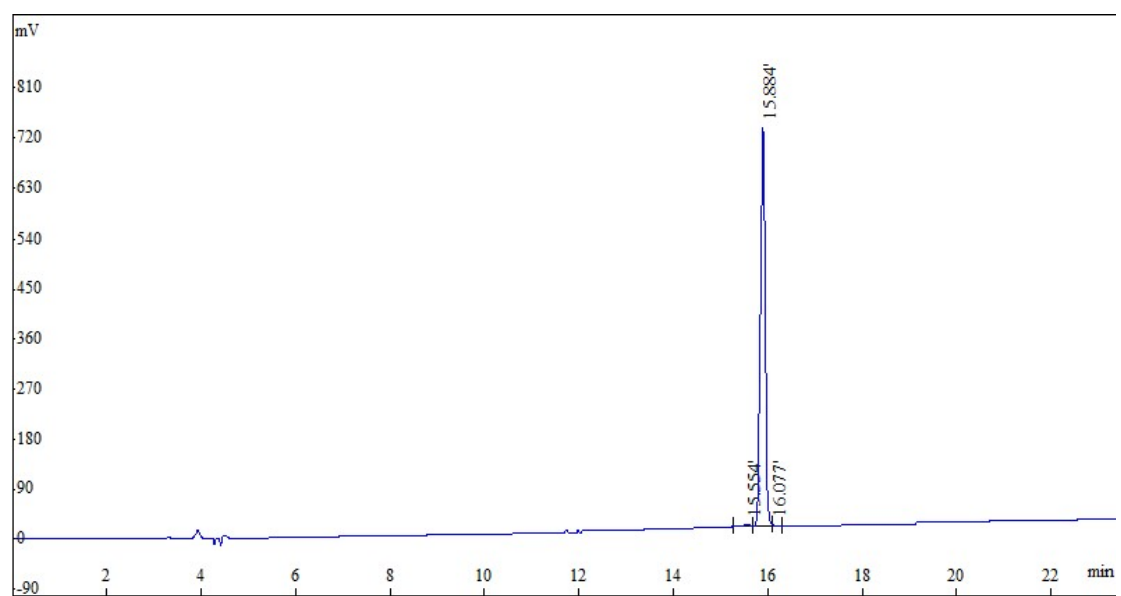

| Rank  | Time   | Conc.   | Area    | Height |
|-------|--------|---------|---------|--------|
| 1     | 15.554 | 0.8264  | 37523   | 4331   |
| 2     | 15.884 | 98.8717 | 4489294 | 715126 |
| 3     | 16.077 | 0.3019  | 13706   | 3642   |
| Total |        | 100     | 4540523 | 723099 |

Figure S14. The HPLC report of 5g.

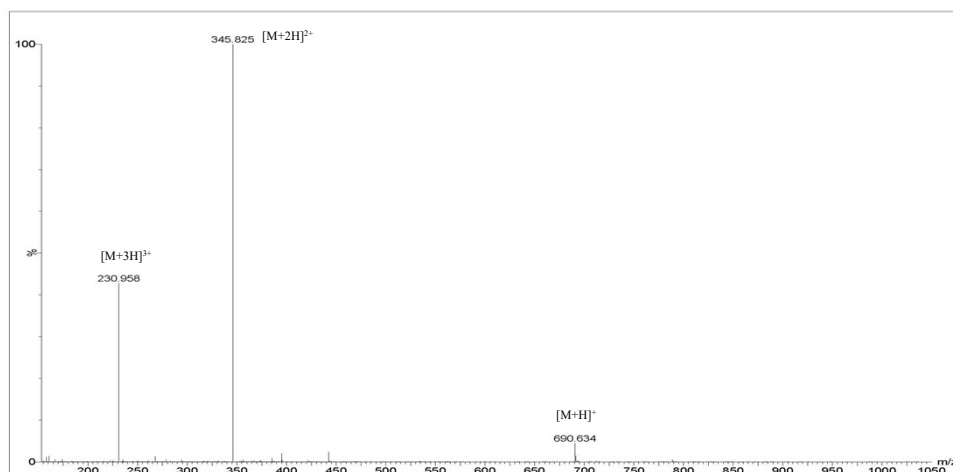

|                                                 |                     |                         |                                      |
|-------------------------------------------------|---------------------|-------------------------|--------------------------------------|
| Sample Description                              | Instrument          | Waters UPLC H-CLASS_QDA |                                      |
| Analyzed date: 2023-05-05                       | Probe:              | ESI                     | Probe Bias: +4.5kv                   |
| Analyst: JH                                     | Nebulizer Gas Flow: | 1.5 L/min               | Detector: 1.5kv                      |
| Sample: SS-31-F r-DMT-K-(2-Nal)-NH <sub>2</sub> | CDL:                | -20.0v                  | T. Flow: 0.2mL/min                   |
| M.W.: 689.86                                    | CDL Temp.:          | 250 °C                  | B. Conc.: 50%H <sub>2</sub> O/50%ACN |
| Lot. No.: P230505-JH60070                       | Block Temp.:        | 200 °C                  |                                      |

Figure S15. The ESI-MS spectrum of **5g**.



Product Name :SS-31-F r-DMT-K-F(NO2)-NH2  
 Lot No :P230505-JH60071  
 Column :Gemini-NX 5µ C18 110A, 4.6\*250mm  
 Solvent A :0.1%Trifluoroacetic in 100% Acetonitrile  
 Solvent B :0.1%Trifluoroacetic in 100% Water  
 Gradient :  
           A                    B  
           0.01min 20%           80%  
           25min 80%            20%  
           25.01min 100%        0%  
           30min                    Stop  
 Flow rate :1.0ml/min  
 Wavelength :220nm  
 Volume :20ul

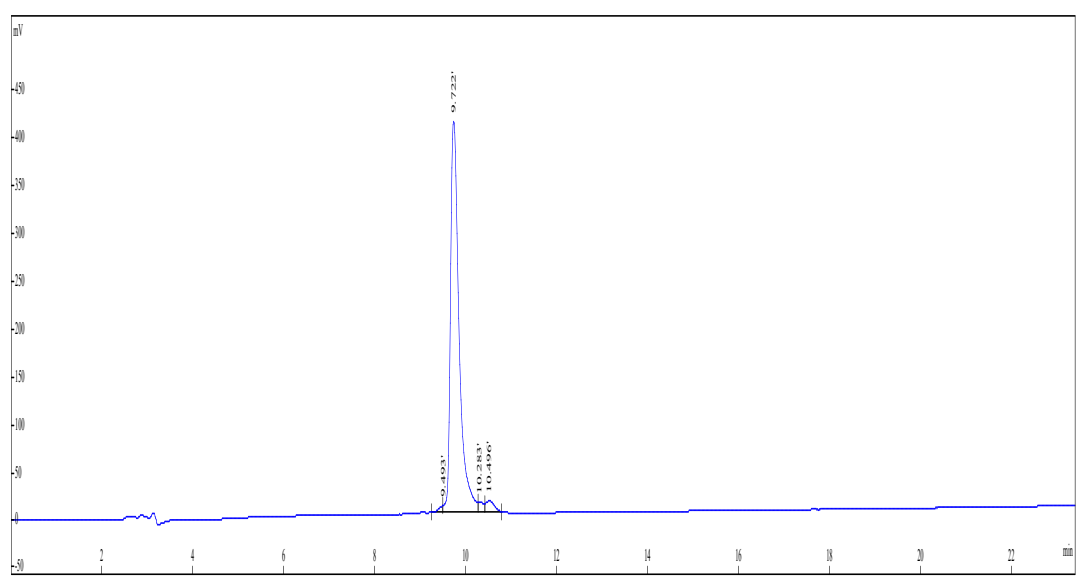

| Rank  | Time   | Conc.   | Area    | Height |
|-------|--------|---------|---------|--------|
| 1     | 9.493  | 0.8261  | 44273   | 7092   |
| 2     | 9.722  | 95.0645 | 5094982 | 407121 |
| 3     | 10.283 | 1.5654  | 83895   | 10412  |
| 4     | 10.496 | 2.5440  | 136347  | 11325  |
| Total |        | 100     | 5359497 | 435950 |

Figure S16. The HPLC report of **5h**.

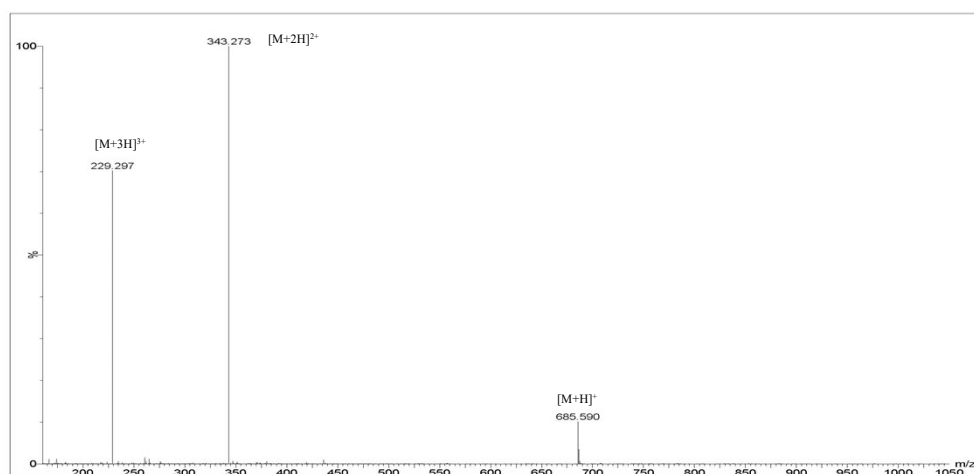

|                                                             |                     |                         |                                      |
|-------------------------------------------------------------|---------------------|-------------------------|--------------------------------------|
| Sample Description                                          | Instrument          | Waters UPLC H-CLASS_QDA |                                      |
| Analyzed date: 2023-05-05                                   | Probe:              | ESI                     | Probe Bias: +4.5kv                   |
| Analyst: JH                                                 | Nebulizer Gas Flow: | 1.5 L/min               | Detector: 1.5kv                      |
| Sample: SS-31-F r-DMT-K-F(NO <sub>2</sub> )-NH <sub>2</sub> | CDL:                | -20.0v                  | T. Flow: 0.2mL/min                   |
| M.W.: 684.80                                                | CDL Temp.:          | 250 °C                  | B. Conc.: 50%H <sub>2</sub> O/50%ACN |
| Lot. No.: P230505-JH60071                                   | Block Temp.:        | 200 °C                  |                                      |

Figure S17. The ESI-MS spectrum of **5h**.

Product Name :SS-31-F r-DMT-K-(hF)-NH2  
 Lot No :P230505-JH60072  
 Column :Gemini-NX 5 $\mu$  C18 110A, 4.6\*250mm  
 Solvent A :0.1%Trifluoroacetic in 100% Acetonitrile  
 Solvent B :0.1%Trifluoroacetic in 100% Water  
 Gradient :
 

|          |      |      |
|----------|------|------|
|          | A    | B    |
| 0.01min  | 10%  | 90%  |
| 25min    | 70%  | 30%  |
| 25.01min | 100% | 0%   |
| 30min    |      | Stop |

  
 Flow rate :1.0ml/min  
 Wavelength :220nm  
 Volume :20ul

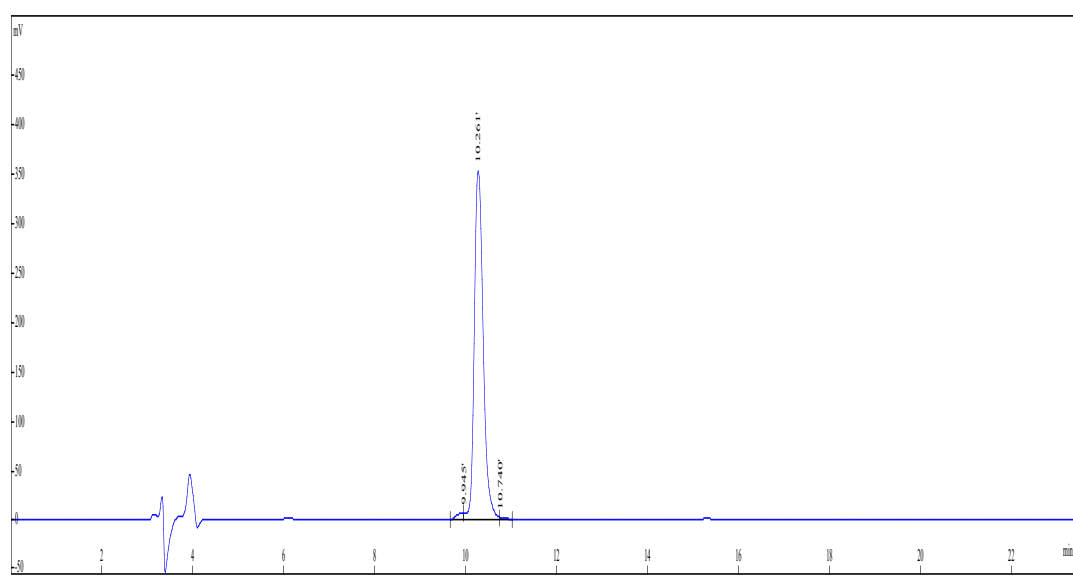

| Rank  | Time   | Conc.   | Area    | Height |
|-------|--------|---------|---------|--------|
| 1     | 9.945  | 1.5278  | 70961   | 6250   |
| 2     | 10.261 | 98.1348 | 4558102 | 351309 |
| 3     | 10.740 | 0.3374  | 15671   | 2024   |
| Total |        | 100     | 4644734 | 359583 |

Figure S18. The HPLC report of **5i**.

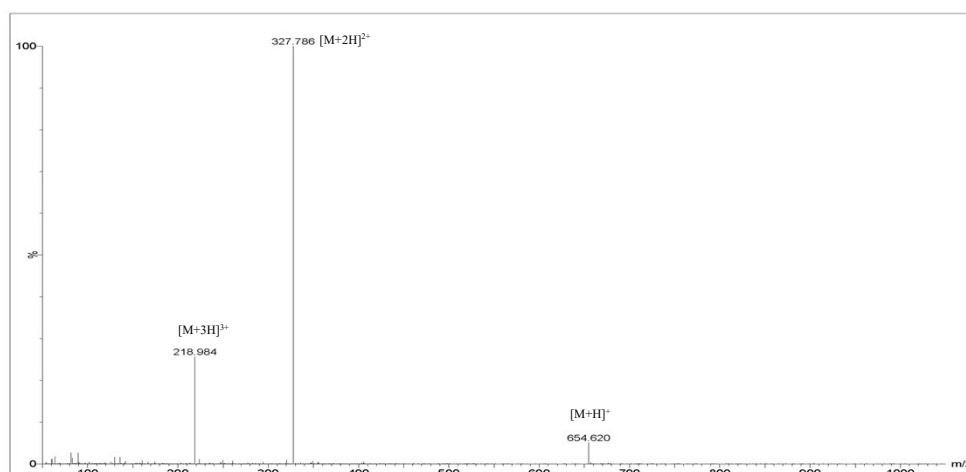

|                                              |                     |                         |             |                            |
|----------------------------------------------|---------------------|-------------------------|-------------|----------------------------|
| Sample Description                           | Instrument          | Waters UPLC H-CLASS_QDA |             |                            |
| Analyzed date: 2023-05-05                    | Probe:              | ESI                     | Probe Bias: | +4.5kv                     |
| Analyst: JH                                  | Nebulizer Gas Flow: | 1.5 L/min               | Detector:   | 1.5kv                      |
| Sample: SS-31-F r-DMT-K-(hF)-NH <sub>2</sub> | CDL:                | -20.0v                  | T. Flow:    | 0.2mL/min                  |
| M.W.: 653.83                                 | CDL Temp.:          | 250 °C                  | B. Conc.:   | 50%H <sub>2</sub> O/50%ACN |
| Lot. No.: P230505-JH60072                    | Block Temp.:        | 200 °C                  |             |                            |

Figure S19. The ESI-MS spectrum of **5i**.

Product Name :SS-31-1-Nal r-DMT-K-1-Nal-NH<sub>2</sub>  
 Lot No :P230528-JH60080  
 Column :Gemini-NX 5μ C18 110A, 4.6\*250mm  
 Solvent A :0.1%Trifluoroacetic in 100% Acetonitrile  
 Solvent B :0.1%Trifluoroacetic in 100% Water  
 Gradient :
 

|          |      |     |
|----------|------|-----|
|          | A    | B   |
| 0.01min  | 10%  | 90% |
| 25min    | 50%  | 50% |
| 25.01min | 100% | 0%  |
| 30min    | Stop |     |

  
 Flow rate :1.0ml/min  
 Wavelength :220nm  
 Volume :20ul

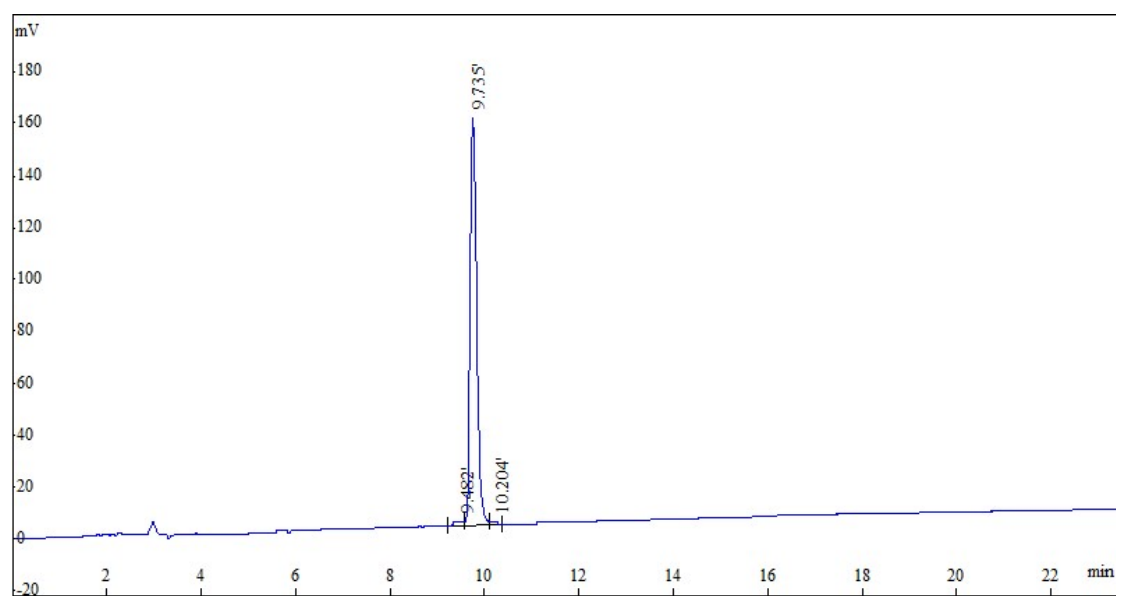

| Rank  | Time   | Conc.   | Area    | Height |
|-------|--------|---------|---------|--------|
| 1     | 9.482  | 1.3188  | 18771   | 1389   |
| 2     | 9.735  | 98.2742 | 1398804 | 156202 |
| 3     | 10.204 | 0.4070  | 5793    | 665    |
| Total |        | 100     | 1423368 | 158256 |

Figure S20. The HPLC report of **5j**.

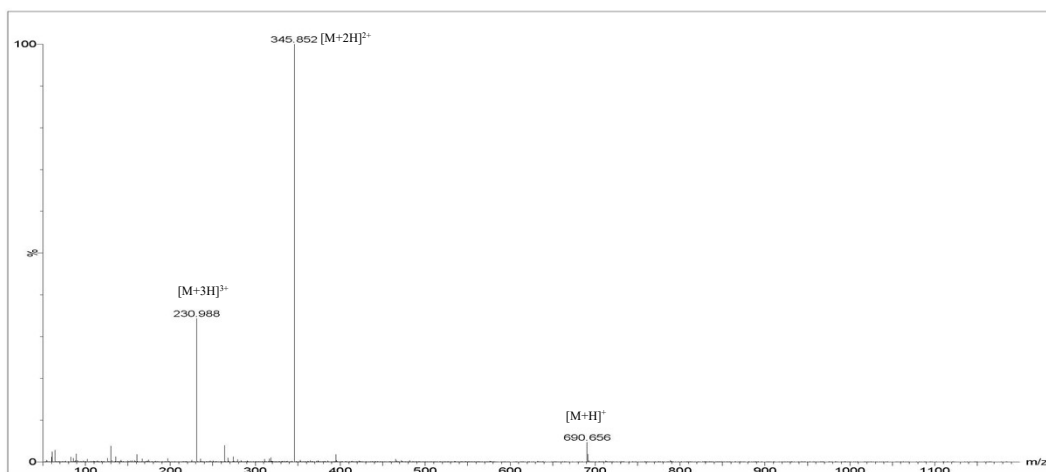

Sample Description

Analyzed date: 2023-05-28  
 Analyst: JH  
 Sample: SS-31-1-Nal r-DMT-K-1-Nal-NH<sub>2</sub>  
 M.W.: 689.86  
 Lot. No.: P230528-JH60080

Instrument

Probe: ESI  
 Nebulizer Gas Flow: 1.5 L/min  
 CDL: -20.0v  
 CDL Temp.: 250 °C  
 Block Temp.: 200 °C

Waters UPLC H-CLASS\_QDA

Probe Bias: +4.5kv  
 Detector: 1.5kv  
 T. Flow: 0.2mL/min  
 B. Conc.: 50%H<sub>2</sub>O/50%ACN

Figure S21. The ESI-MS spectrum of **5j**.

Product Name :SS-31-W r-DMT-K-W-NH<sub>2</sub>  
 Lot No :P230524-JH60081  
 Column :Gemini-NX 5μ C18 110A, 4.6\*250mm  
 Solvent A :0.1%Trifluoroacetic in 100% Acetonitrile  
 Solvent B :0.1%Trifluoroacetic in 100% Water  
 Gradient :
 

|           |      |     |
|-----------|------|-----|
|           | A    | B   |
| 0.01min   | 25%  | 75% |
| 25min     | 50%  | 50% |
| 25.01min3 | 100% | 0%  |
| 30min     | Stop |     |

  
 Flow rate :1.0ml/min  
 Wavelength :220nm  
 Volume :20ul

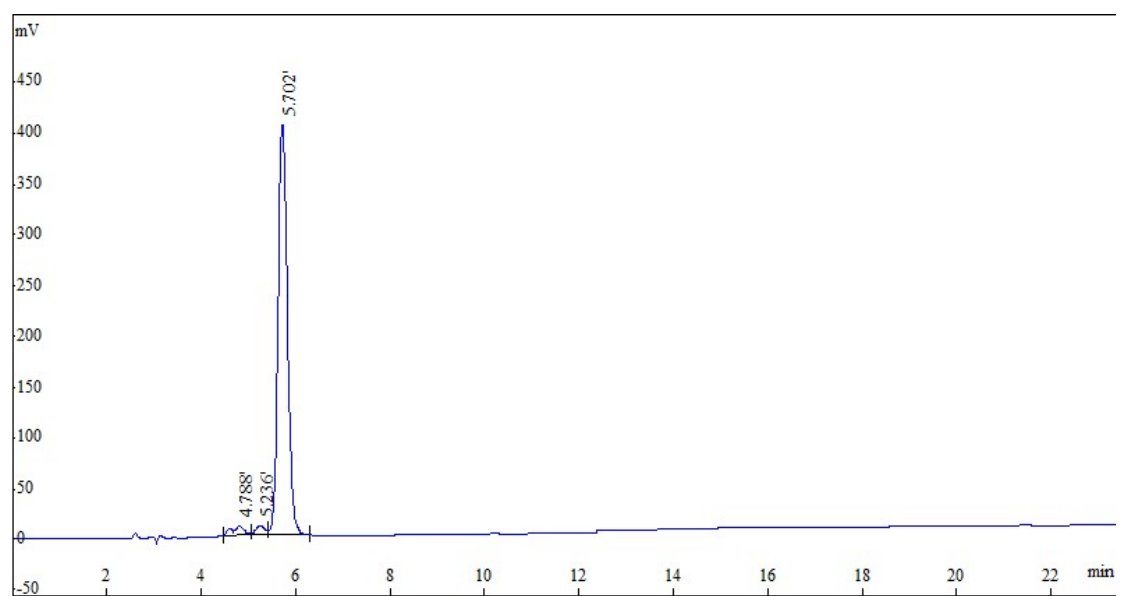

| Rank  | Time  | Conc.   | Area    | Height |
|-------|-------|---------|---------|--------|
| 1     | 4.788 | 2.7828  | 154825  | 8633   |
| 2     | 5.236 | 2.1501  | 119626  | 8977   |
| 3     | 5.702 | 95.0671 | 5289209 | 403272 |
| Total |       | 100     | 5563660 | 420882 |

Figure S22. The HPLC report of **5k**.

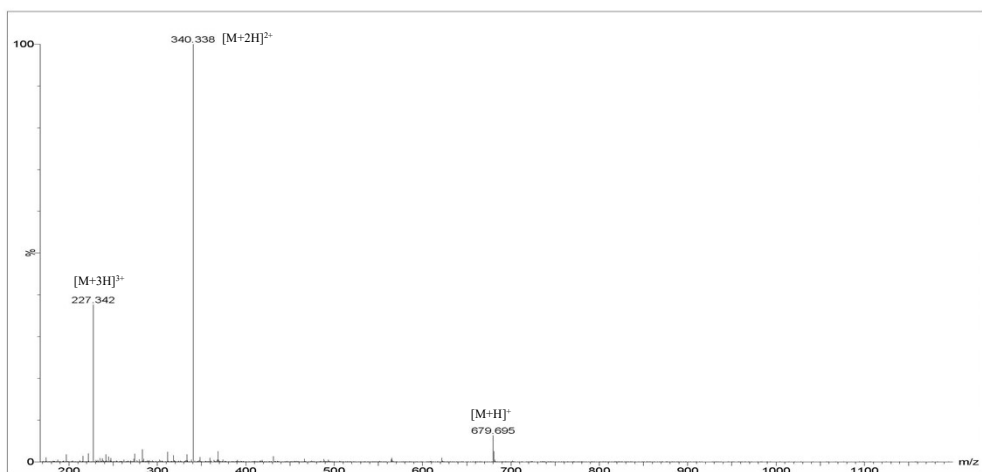

|                                           |                     |                         |                                      |
|-------------------------------------------|---------------------|-------------------------|--------------------------------------|
| Sample Description                        | Instrument          | Waters UPLC H-CLASS_QDA |                                      |
| Analyzed date: 2023-05-24                 | Probe:              | ESI                     | Probe Bias: +4.5kv                   |
| Analyst: JH                               | Nebulizer Gas Flow: | 1.5 L/min               | Detector: 1.5kv                      |
| Sample: SS-31-W r-DMT-K-W-NH <sub>2</sub> | CDL:                | -20.0v                  | T. Flow: 0.2mL/min                   |
| M.W.: 678.84                              | CDL Temp.:          | 250 °C                  | B. Conc.: 50%H <sub>2</sub> O/50%ACN |
| Lot. No.: P230524-JH60081                 | Block Temp.:        | 200 °C                  |                                      |

Figure S23. The ESI-MS spectrum of **5k**.



Product Name :SS-31-Phe(Me) r-DMT-K-Phe(Me)-NH<sub>2</sub>  
 Lot No :P230528-JH60082  
 Column :Gemini-NX 5μ C18 110A, 4.6\*250mm  
 Solvent A :0.1%Trifluoroacetic in 100% Acetonitrile  
 Solvent B :0.1%Trifluoroacetic in 100% Water  
 Gradient :
 

|          |      |     |
|----------|------|-----|
|          | A    | B   |
| 0.01min  | 10%  | 90% |
| 25min    | 55%  | 45% |
| 25.01min | 100% | 0%  |
| 30min    | Stop |     |

  
 Flow rate :1.0ml/min  
 Wavelength :220nm  
 Volume :20ul

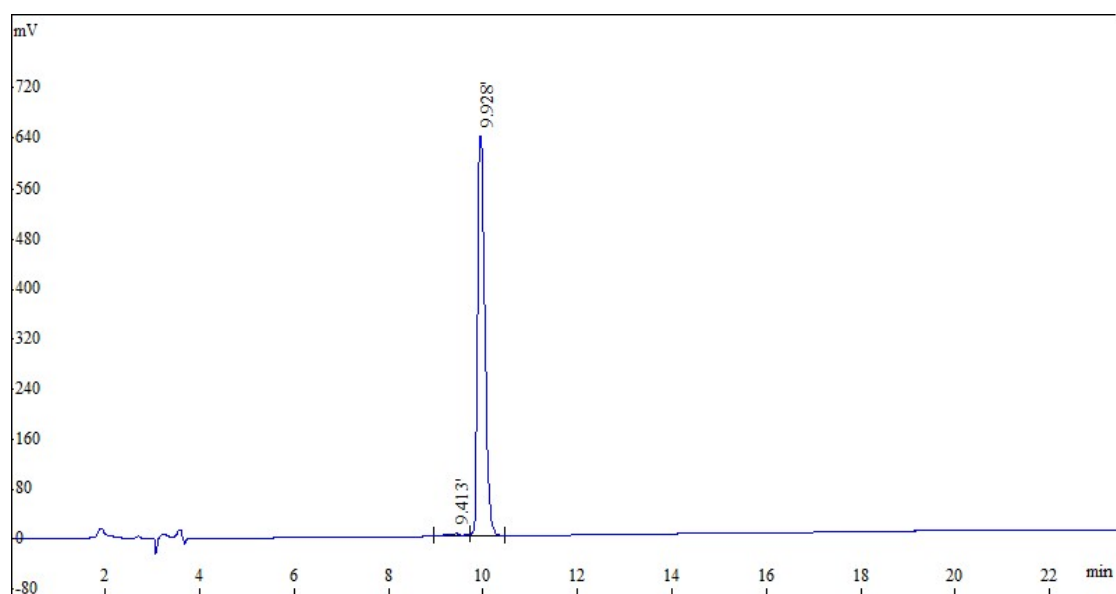

| Rank  | Time  | Conc.   | Area    | Height |
|-------|-------|---------|---------|--------|
| 1     | 9.413 | 1.7601  | 113876  | 4700   |
| 2     | 9.928 | 98.2399 | 6355897 | 638440 |
| Total |       | 100     | 6469773 | 643140 |

Figure S24. The HPLC report of **5I**.

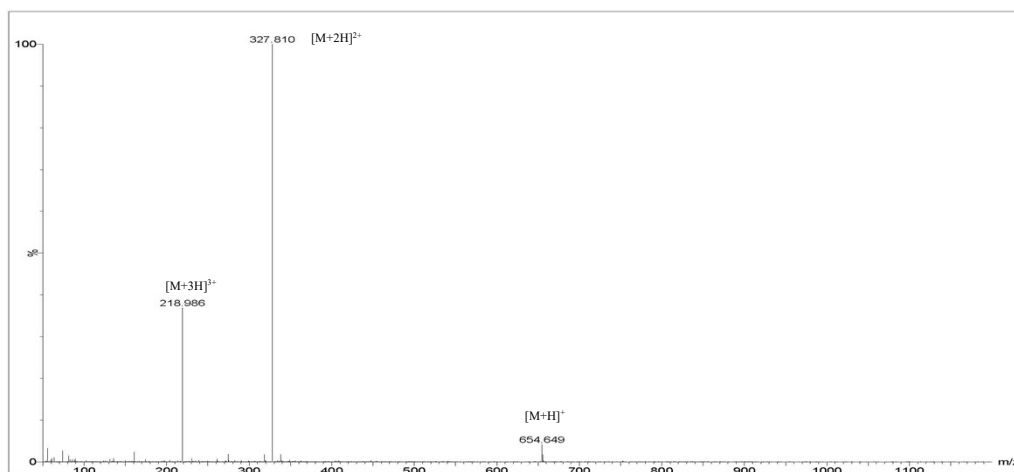

|                                                       |                     |                         |                                      |
|-------------------------------------------------------|---------------------|-------------------------|--------------------------------------|
| Sample Description                                    | Instrument          | Waters UPLC H-CLASS_QDA |                                      |
| Analyzed date: 2023-05-28                             | Probe:              | ESI                     | Probe Bias: +4.5kv                   |
| Analyst: JH                                           | Nebulizer Gas Flow: | 1.5 L/min               | Detector: 1.5kv                      |
| Sample: SS-31-Phe(Me) r-DMT-K-Phe(Me)-NH <sub>2</sub> | CDL:                | -20.0v                  | T. Flow: 0.2mL/min                   |
| M.W.: 653.83                                          | CDL Temp.:          | 250 °C                  | B. Conc.: 50%H <sub>2</sub> O/50%ACN |
| Lot. No.: P230528-JH60082                             | Block Temp.:        | 200 °C                  |                                      |

Figure S25. The ESI-MS spectrum of **5I**.

Product Name :SS-31-Y r-DMT-K-Y-NH<sub>2</sub>  
 Lot No :P230524-JH60083  
 Column :Gemini-NX 5μ C18 110A, 4.6\*250mm  
 Solvent A :0.1%Trifluoroacetic in 100% Acetonitrile  
 Solvent B :0.1%Trifluoroacetic in 100% Water  
 Gradient :  
           A                                  B  
           0.01min 10%                  90%  
           25min 45%                  55%  
           25.01min3 100%              0%  
           30min Stop  
 Flow rate :1.0ml/min  
 Wavelength :220nm  
 Volume :20ul

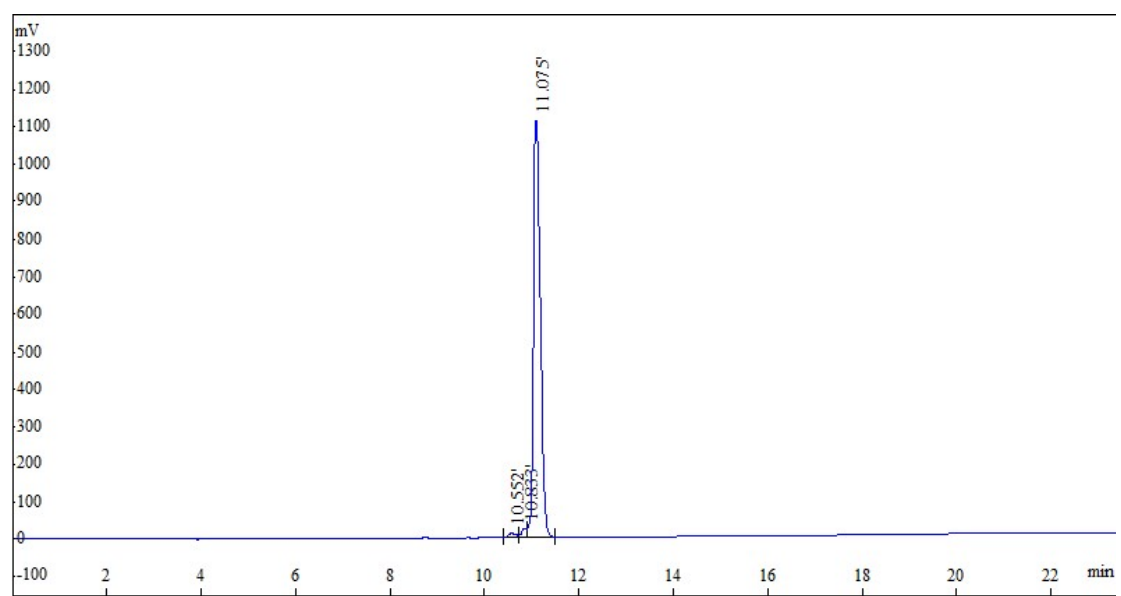

| Rank  | Time   | Conc.   | Area     | Height  |
|-------|--------|---------|----------|---------|
| 1     | 10.552 | 1.0456  | 112604   | 11391   |
| 2     | 10.833 | 1.4390  | 154974   | 23461   |
| 3     | 11.075 | 97.5154 | 10501878 | 1108327 |
| Total |        | 100     | 10769456 | 1143179 |

Figure S26. The HPLC report of **5m**.

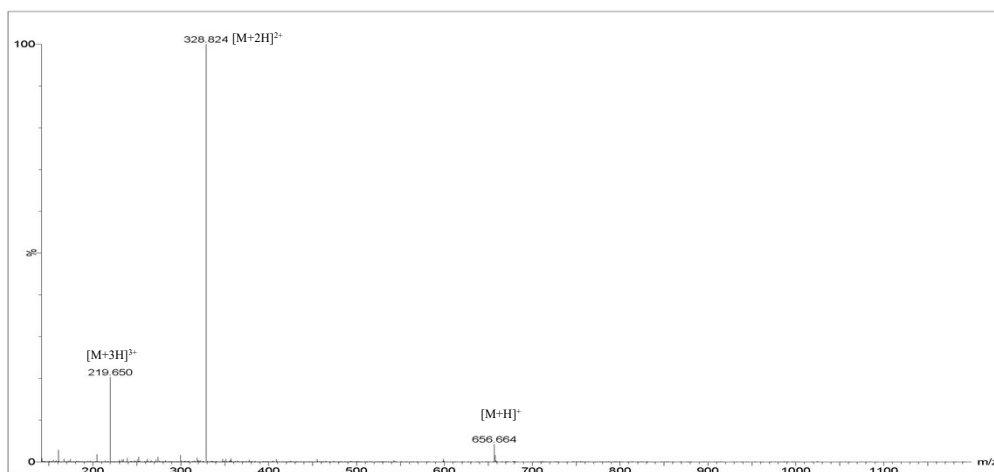

|                                           |                     |                         |                                      |
|-------------------------------------------|---------------------|-------------------------|--------------------------------------|
| Sample Description                        | Instrument          | Waters UPLC H-CLASS_QDA |                                      |
| Analyzed date: 2023-05-24                 | Probe:              | ESI                     | Probe Bias: +4.5kv                   |
| Analyst: JH                               | Nebulizer Gas Flow: | 1.5 L/min               | Detector: 1.5kv                      |
| Sample: SS-31-Y r-DMT-K-Y-NH <sub>2</sub> | CDL:                | -20.0v                  | T. Flow: 0.2mL/min                   |
| M.W.: 655.80                              | CDL Temp.:          | 250 °C                  | B. Conc.: 50%H <sub>2</sub> O/50%ACN |
| Lot. No.: P230524-JH60083                 | Block Temp.:        | 200 °C                  |                                      |

Figure S27. The ESI-MS spectrum of **5m**.

Product Name :SS-31-Tyr(Bzl) r-DMT-K-Tyr(Bzl)-NH<sub>2</sub>  
 Lot No :P230528-JH60084  
 Column :Gemini-NX 5μ C18 110A, 4.6\*250mm  
 Solvent A :0.1%Trifluoroacetic in 100% Acetonitrile  
 Solvent B :0.1%Trifluoroacetic in 100% Water  
 Gradient :
 

|          |      |     |
|----------|------|-----|
|          | A    | B   |
| 0.01min  | 10%  | 90% |
| 25min    | 40%  | 60% |
| 25.01min | 100% | 0%  |
| 30min    | Stop |     |

  
 Flow rate :1.0ml/min  
 Wavelength :220nm  
 Volume :20ul

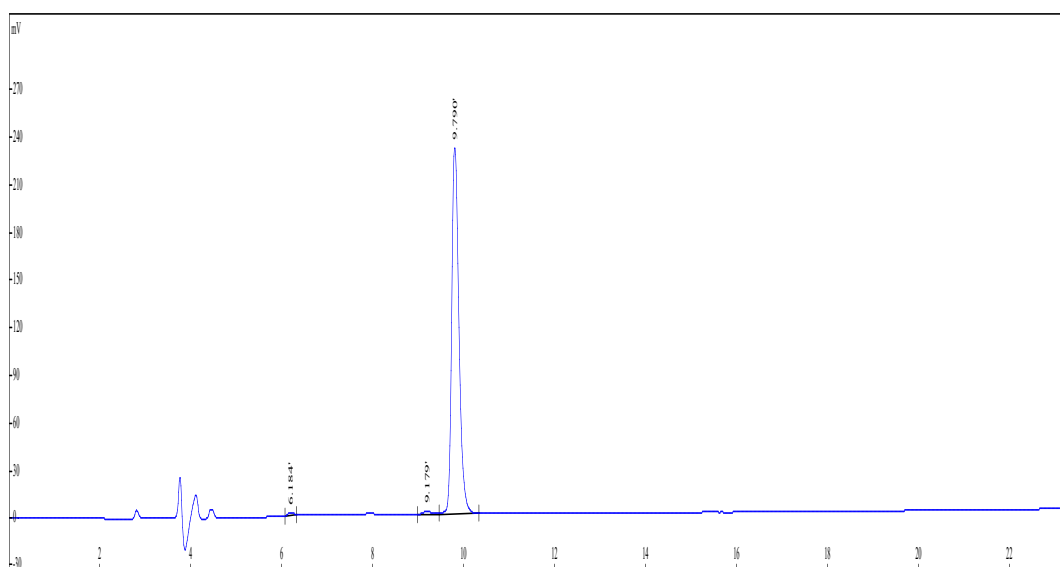

| Rank  | Time  | Conc.   | Area    | Height |
|-------|-------|---------|---------|--------|
| 1     | 6.184 | 0.6501  | 15728   | 2006   |
| 2     | 9.179 | 0.8768  | 21213   | 1866   |
| 3     | 9.790 | 98.4731 | 2382435 | 230281 |
| Total |       | 100     | 2419376 | 234153 |

Figure S28. The HPLC report of **5n**.

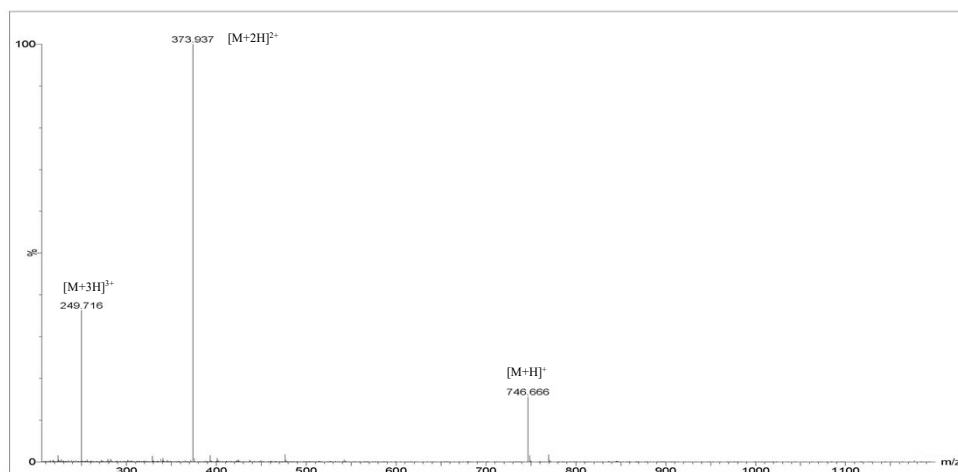

|                                                         |                     |                         |                                      |
|---------------------------------------------------------|---------------------|-------------------------|--------------------------------------|
| Sample Description                                      | Instrument          | Waters UPLC H-CLASS_QDA |                                      |
| Analyzed date: 2023-05-28                               | Probe:              | ESI                     | Probe Bias: +4.5kv                   |
| Analyst: JH                                             | Nebulizer Gas Flow: | 1.5 L/min               | Detector: 1.5kv                      |
| Sample: SS-31-Tyr(Bzl) r-DMT-K-Tyr(Bzl)-NH <sub>2</sub> | CDL:                | -20.0v                  | T. Flow: 0.2mL/min                   |
| M.W.: 745.93                                            | CDL Temp.:          | 250 °C                  | B. Conc.: 50%H <sub>2</sub> O/50%ACN |
| Lot. No.: P230528-JH60084                               | Block Temp.:        | 200 °C                  |                                      |

Figure S29. The ESI-MS spectrum of **5n**.

Product Name :SS-31-Tyr(Et) r-DMT-K-Tyr(Et)-NH<sub>2</sub>  
 Lot No :P230528-JH60085  
 Column :Gemini-NX 5μ C18 110A, 4.6\*250mm  
 Solvent A :0.1%Trifluoroacetic in 100% Acetonitrile  
 Solvent B :0.1%Trifluoroacetic in 100% Water  
 Gradient :
 

|           |      |     |
|-----------|------|-----|
|           | A    | B   |
| 0.01min   | 10%  | 90% |
| 25min     | 50%  | 50% |
| 25.01min3 | 100% | 0%  |
| 30min     | Stop |     |

Flow rate :1.0ml/min  
 Wavelength :220nm  
 Volume :20ul

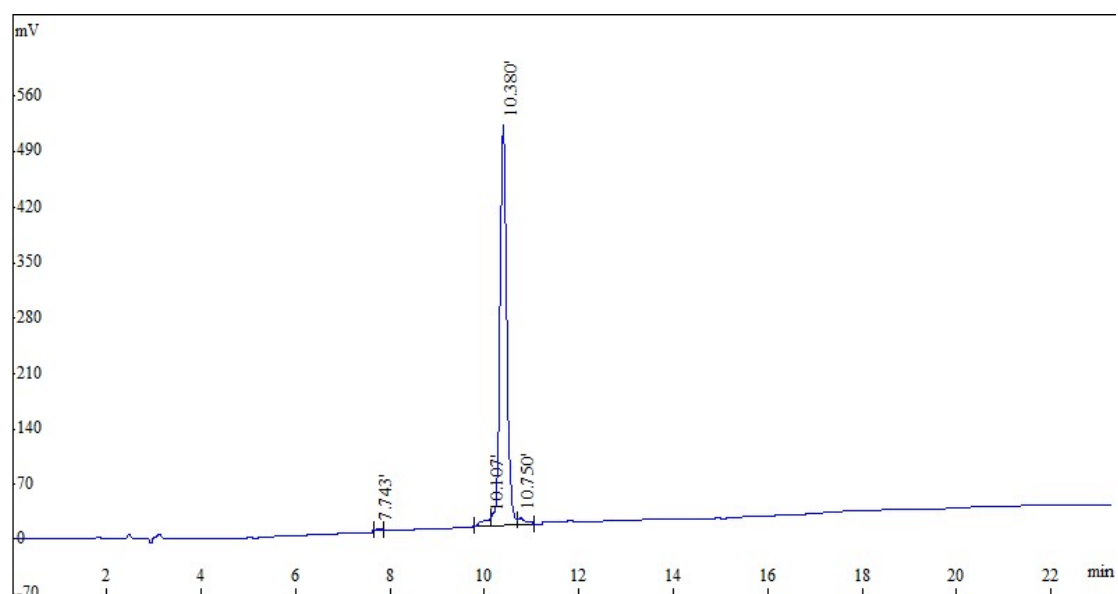

| Rank  | Time   | Conc.   | Area    | Height |
|-------|--------|---------|---------|--------|
| 1     | 7.743  | 0.4135  | 20050   | 3092   |
| 2     | 10.107 | 2.1288  | 103219  | 8238   |
| 3     | 10.380 | 95.8274 | 4646441 | 505859 |
| 4     | 10.750 | 1.6303  | 79051   | 7879   |
| Total |        | 100     | 4848761 | 525068 |

Figure S30. The HPLC report of **5o**.

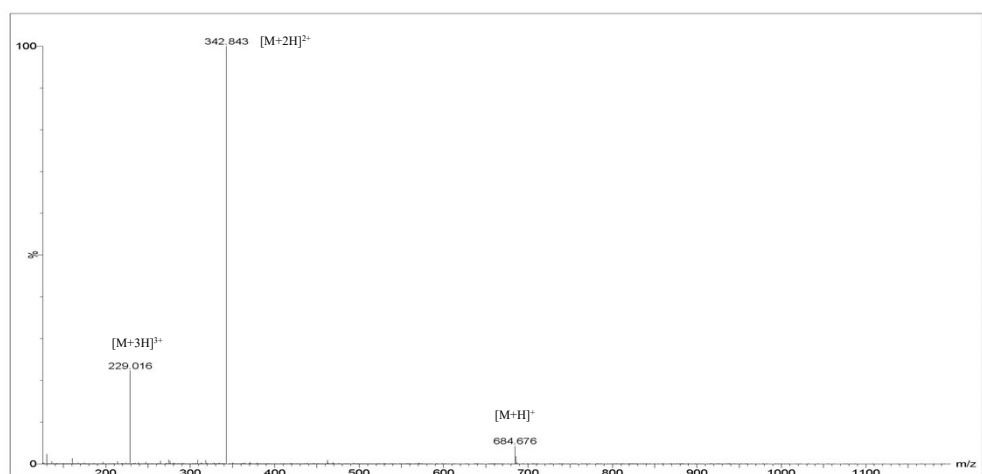

|                                                       |                     |                         |                                      |
|-------------------------------------------------------|---------------------|-------------------------|--------------------------------------|
| Sample Description                                    | Instrument          | Waters UPLC H-CLASS_QDA |                                      |
| Analyzed date: 2023-05-28                             | Probe:              | ESI                     | Probe Bias: +4.5kv                   |
| Analyst: JH                                           | Nebulizer Gas Flow: | 1.5 L/min               | Detector: 1.5kv                      |
| Sample: SS-31-Tyr(Et) r-DMT-K-Tyr(Et)-NH <sub>2</sub> | CDL:                | -20.0v                  | T. Flow: 0.2mL/min                   |
| M.W.: 683.86                                          | CDL Temp.:          | 250 °C                  | B. Conc.: 50%H <sub>2</sub> O/50%ACN |
| Lot. No.: P230528-JH60085                             | Block Temp.:        | 200 °C                  |                                      |

Figure S31. The ESI-MS spectrum of **50**.



Product Name :SS-31-Tyr(Me) r-DMT-K-Tyr(Me)-NH<sub>2</sub>  
 Lot No :P230528-JH60086  
 Column :Gemini-NX 5μ C18 110A, 4.6\*250mm  
 Solvent A :0.1%Trifluoroacetic in 100% Acetonitrile  
 Solvent B :0.1%Trifluoroacetic in 100% Water  
 Gradient :
 

|          |      |     |
|----------|------|-----|
|          | A    | B   |
| 0.01min  | 10%  | 90% |
| 25min    | 45%  | 55% |
| 25.01min | 100% | 0%  |
| 30min    | Stop |     |

  
 Flow rate :1.0ml/min  
 Wavelength :220nm  
 Volume :20ul

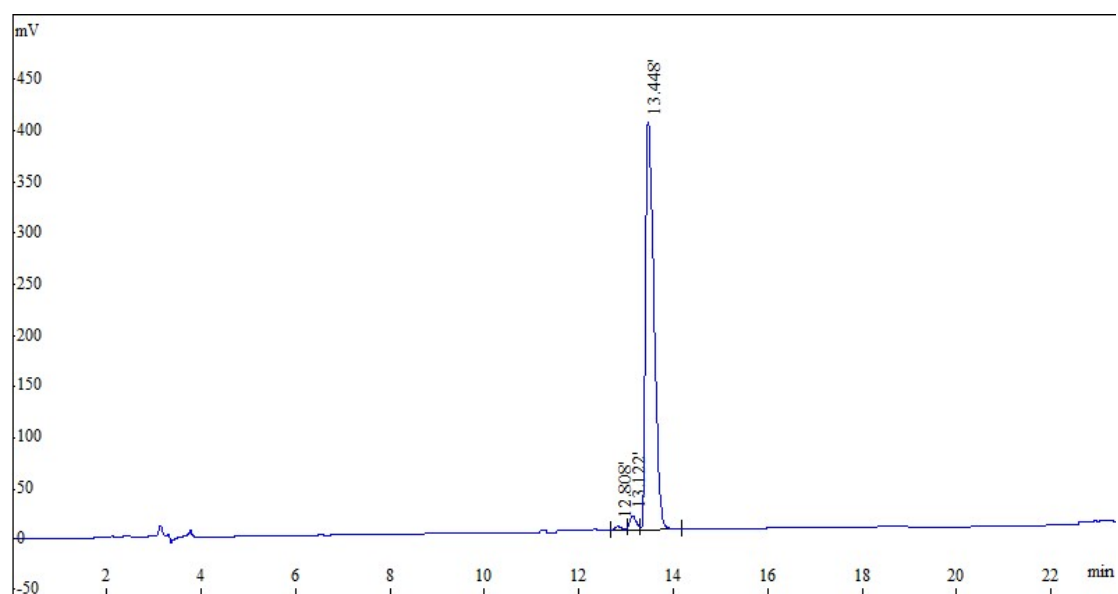

| Rank  | Time   | Conc.   | Area    | Height |
|-------|--------|---------|---------|--------|
| 1     | 12.808 | 0.8551  | 42187   | 3888   |
| 2     | 13.122 | 2.7142  | 133914  | 14597  |
| 3     | 13.448 | 96.4307 | 4757684 | 398805 |
| Total |        | 100     | 4933785 | 417290 |

Figure S32. The HPLC report of **5p**.

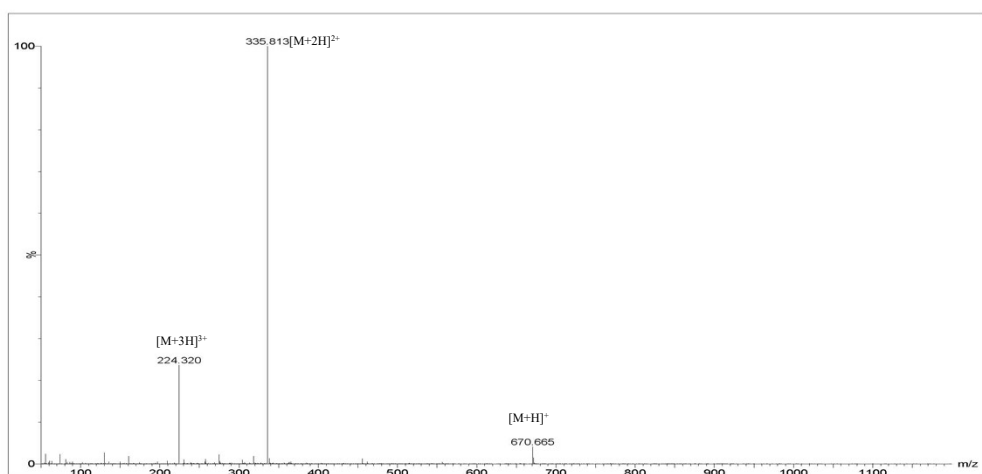

|                                                       |                     |                         |                                      |
|-------------------------------------------------------|---------------------|-------------------------|--------------------------------------|
| Sample Description                                    | Instrument          | Waters UPLC H-CLASS_QDA |                                      |
| Analyzed date: 2023-05-28                             | Probe:              | ESI                     | Probe Bias: +4.5kv                   |
| Analyst: JH                                           | Nebulizer Gas Flow: | 1.5 L/min               | Detector: 1.5kv                      |
| Sample: SS-31-Tyr(Me) r-DMT-K-Tyr(Me)-NH <sub>2</sub> | CDL:                | -20.0v                  | T. Flow: 0.2mL/min                   |
| M.W.: 669.83                                          | CDL Temp.:          | 250 °C                  | B. Conc.: 50%H <sub>2</sub> O/50%ACN |
| Lot. No.: P230528-JH60086                             | Block Temp.:        | 200 °C                  |                                      |

Figure S33. The ESI-MS spectrum of **5p**.

Product Name :SS-31-R r-DMT-R-F-NH<sub>2</sub>  
 Lot No :P230524-JH60087  
 Column :Gemini-NX 5μ C18 110A, 4.6\*250mm  
 Solvent A :0.1%Trifluoroacetic in 100% Acetonitrile  
 Solvent B :0.1%Trifluoroacetic in 100% Water  
 Gradient :
 

|          |      |      |
|----------|------|------|
|          | A    | B    |
| 0.01min  | 10%  | 90%  |
| 25min    | 50%  | 50%  |
| 25.01min | 100% | 0%   |
| 30min    |      | Stop |

Flow rate :1.0ml/min  
 Wavelength :220nm  
 Volume :20ul

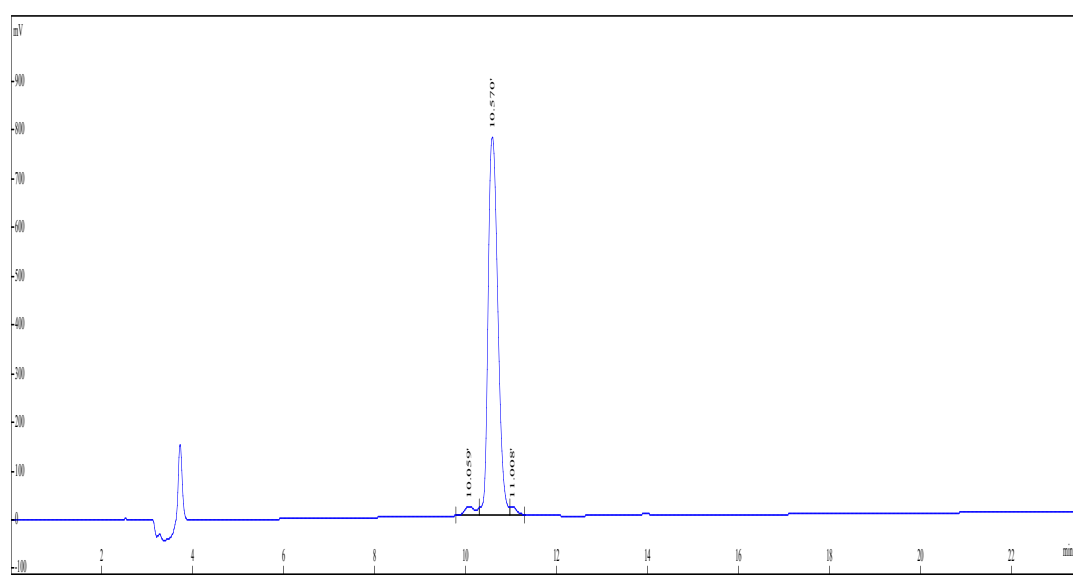

| Rank  | Time   | Conc.   | Area     | Height |
|-------|--------|---------|----------|--------|
| 1     | 10.059 | 2.7739  | 316741   | 17931  |
| 2     | 10.570 | 95.8394 | 10943477 | 772778 |
| 3     | 11.008 | 1.3867  | 158336   | 17921  |
| Total |        | 100     | 11418554 | 808630 |

Figure S34. The HPLC report of **5q**.

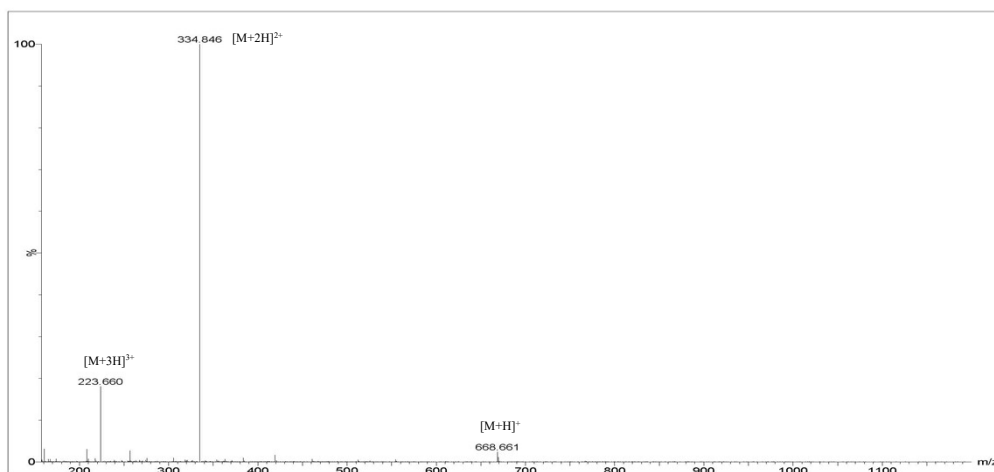

|                                           |                     |                         |                                      |
|-------------------------------------------|---------------------|-------------------------|--------------------------------------|
| Sample Description                        | Instrument          | Waters UPLC H-CLASS_QDA |                                      |
| Analyzed date: 2023-05-24                 | Probe:              | ESI                     | Probe Bias: +4.5kv                   |
| Analyst: JH                               | Nebulizer Gas Flow: | 1.5 L/min               | Detector: 1.5kv                      |
| Sample: SS-31-R r-DMT-R-F-NH <sub>2</sub> | CDL:                | -20.0v                  | T. Flow: 0.2mL/min                   |
| M.W.: 667.82                              | CDL Temp.:          | 250 °C                  | B. Conc.: 50%H <sub>2</sub> O/50%ACN |
| Lot. No.: P230524-JH60087                 | Block Temp.:        | 200 °C                  |                                      |

Figure S35. The ESI-MS spectrum of **5q**.

Product Name :SS-31-Cit r-DMT-Cit-F-NH<sub>2</sub>  
 Lot No :P230524-JH60088  
 Column :Gemini-NX 5μ C18 110A, 4.6\*250mm  
 Solvent A :0.1%Trifluoroacetic in 100% Acetonitrile  
 Solvent B :0.1%Trifluoroacetic in 100% Water  
 Gradient :
 

|           | A    | B   |
|-----------|------|-----|
| 0.01min   | 10%  | 90% |
| 25min     | 50%  | 50% |
| 25.01min3 | 100% | 0%  |
| 30min     | Stop |     |

  
 Flow rate :1.0ml/min  
 Wavelength :220nm  
 Volume :20ul

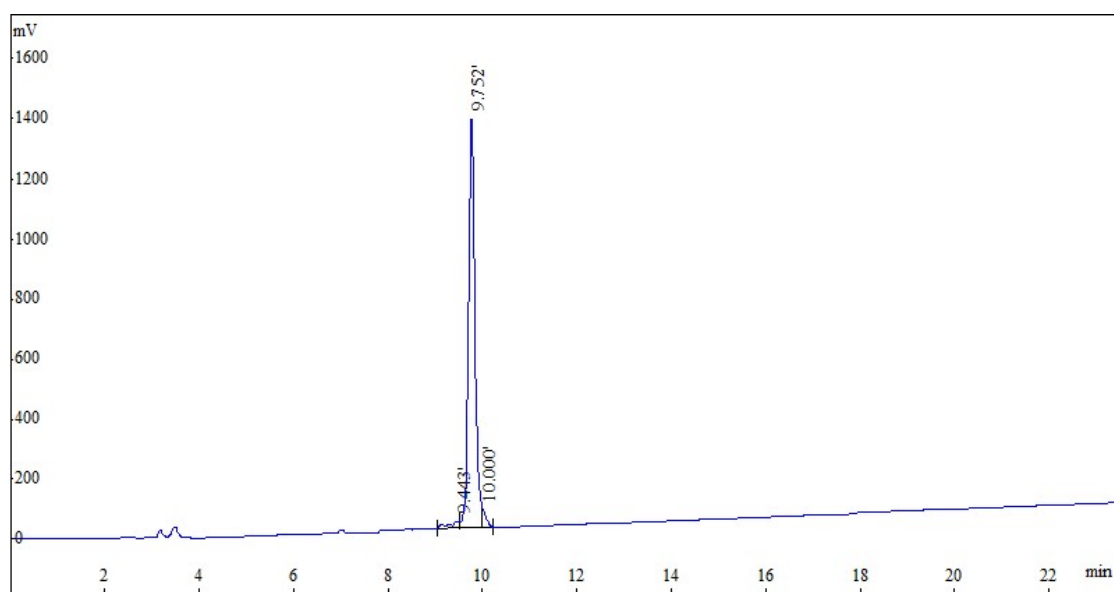

| Rank  | Time   | Conc.   | Area     | Height  |
|-------|--------|---------|----------|---------|
| 1     | 9.443  | 3.0553  | 384647   | 20725   |
| 2     | 9.752  | 95.0886 | 11971002 | 1358101 |
| 3     | 10.000 | 1.8561  | 233675   | 54095   |
| Total |        | 100     | 12589324 | 1432921 |

Figure S36. The HPLC report of **5r**.

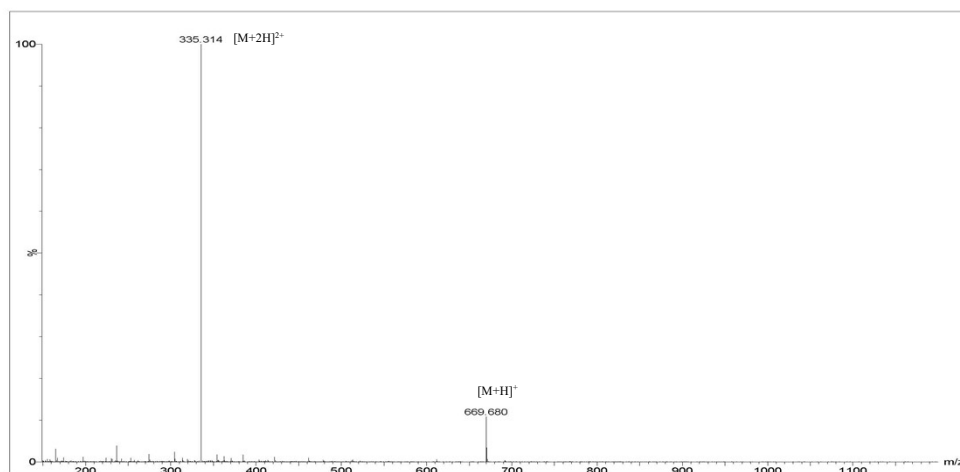

|                                               |                     |                         |             |                            |
|-----------------------------------------------|---------------------|-------------------------|-------------|----------------------------|
| Sample Description                            | Instrument          | Waters UPLC H-CLASS_QDA |             |                            |
| Analyzed date: 2023-05-24                     | Probe:              | ESI                     | Probe Bias: | +4.5kv                     |
| Analyst: JH                                   | Nebulizer Gas Flow: | 1.5 L/min               | Detector:   | 1.5kv                      |
| Sample: SS-31-Cit r-DMT-Cit-F-NH <sub>2</sub> | CDL:                | -20.0v                  | T. Flow:    | 0.2mL/min                  |
| M.W.: 668.80                                  | CDL Temp.:          | 250 °C                  | B. Conc.:   | 50%H <sub>2</sub> O/50%ACN |
| Lot. No.: P230524-JH60088                     | Block Temp.:        | 200 °C                  |             |                            |

Figure S37. The ESI-MS spectrum of **5r**.

Product Name :SS-31-H r-DMT-H-F-NH<sub>2</sub>  
 Lot No :P230524-JH60089  
 Column :Gemini-NX 5μ C18 110A, 4.6\*250mm  
 Solvent A :0.1%Trifluoroacetic in 100% Acetonitrile  
 Solvent B :0.1%Trifluoroacetic in 100% Water  
 Gradient :
 

|           |      |     |
|-----------|------|-----|
|           | A    | B   |
| 0.01min   | 10%  | 90% |
| 25min     | 50%  | 50% |
| 25.01min3 | 100% | 0%  |
| 30min     | Stop |     |

  
 Flow rate :1.0ml/min  
 Wavelength :220nm  
 Volume :20ul

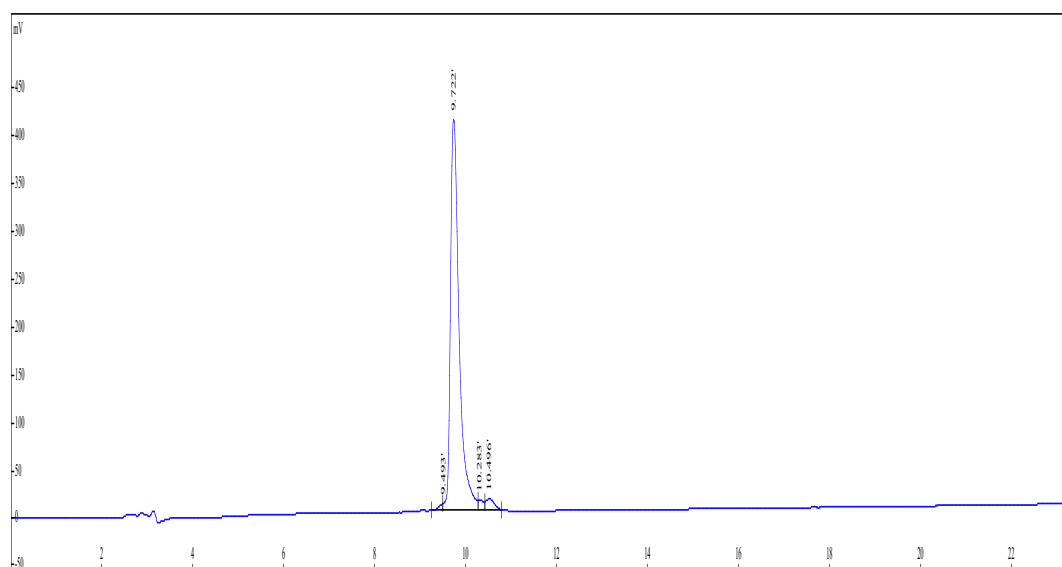

| Rank  | Time   | Conc.   | Area    | Height |
|-------|--------|---------|---------|--------|
| 1     | 9.493  | 0.8261  | 44273   | 7092   |
| 2     | 9.722  | 95.0645 | 5094982 | 407121 |
| 3     | 10.283 | 1.5654  | 83895   | 10412  |
| 4     | 10.496 | 2.5440  | 136347  | 11325  |
| Total |        | 100     | 5359497 | 435950 |

Figure S38. The HPLC report of **5s**.

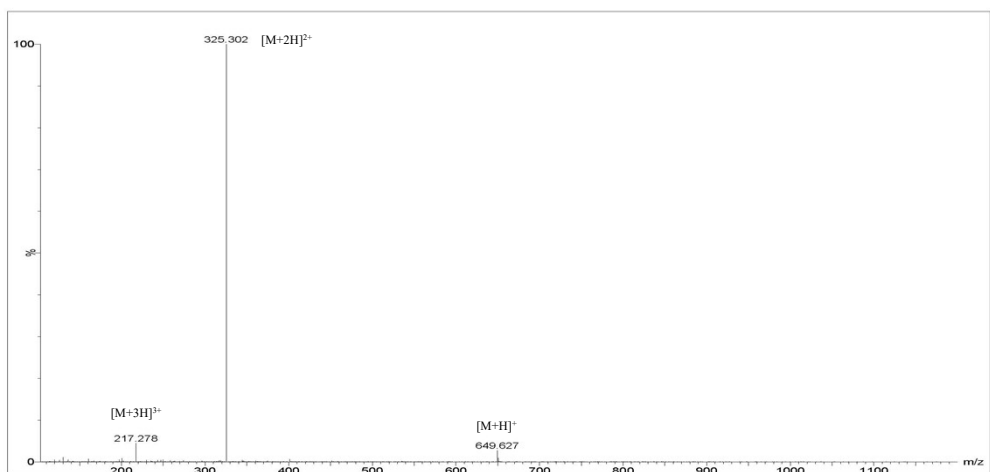

|                                           |                     |                         |                                      |
|-------------------------------------------|---------------------|-------------------------|--------------------------------------|
| Sample Description                        | Instrument          | Waters UPLC H-CLASS_QDA |                                      |
| Analyzed date: 2023-05-24                 | Probe:              | ESI                     | Probe Bias: +4.5kv                   |
| Analyst: JH                               | Nebulizer Gas Flow: | 1.5 L/min               | Detector: 1.5kv                      |
| Sample: SS-31-H r-DMT-H-F-NH <sub>2</sub> | CDL:                | -20.0v                  | T. Flow: 0.2mL/min                   |
| M.W.: 648.77                              | CDL Temp.:          | 250 °C                  | B. Conc.: 50%H <sub>2</sub> O/50%ACN |
| Lot. No.: P230524-JH60089                 | Block Temp.:        | 200 °C                  |                                      |

Figure S39. The ESI-MS spectrum of **5s**.
